# Supplementary material
Source: Royal Society of Chemistry journal article supplement (doi:10.1039/d6eb00002a)
Supplement: d6eb00002a1.pdf [file d6eb00002a1.pdf]

Supplementary Information

## Scaling up Si-C composite synthesis from recycled graphite for high-energy-density and low-environmental-impact batteries

Denis Dienguila Kionga<sup>1</sup>, Théodore Barret<sup>1</sup>, Martin Raaen<sup>1</sup>, Lisa Vericel<sup>2</sup>, Anna Vanderbruggen<sup>3</sup>, Giulia Pezzin<sup>4</sup>, Giovanni Andrea Blengini<sup>4</sup>, Alessandra Manzini<sup>5</sup>, Willy Porcher<sup>2</sup>, Pascale Chenevier<sup>1,\*</sup>

<sup>1</sup> Univ. Grenoble Alpes, CEA, CNRS, Grenoble-INP, IRIG, SYMMES, 38000 Grenoble, France

<sup>2</sup> Univ. Grenoble Alpes, CEA, LITEN, DEHT, 38000 Grenoble, France

<sup>3</sup> Université de Lorraine, CNRS, GeoRessources, F-54506 Vandoeuvre-lès-Nancy, France

<sup>4</sup> Politecnico di Torino, Torino, Italy

<sup>5</sup> CY Paris University, Cergy, France

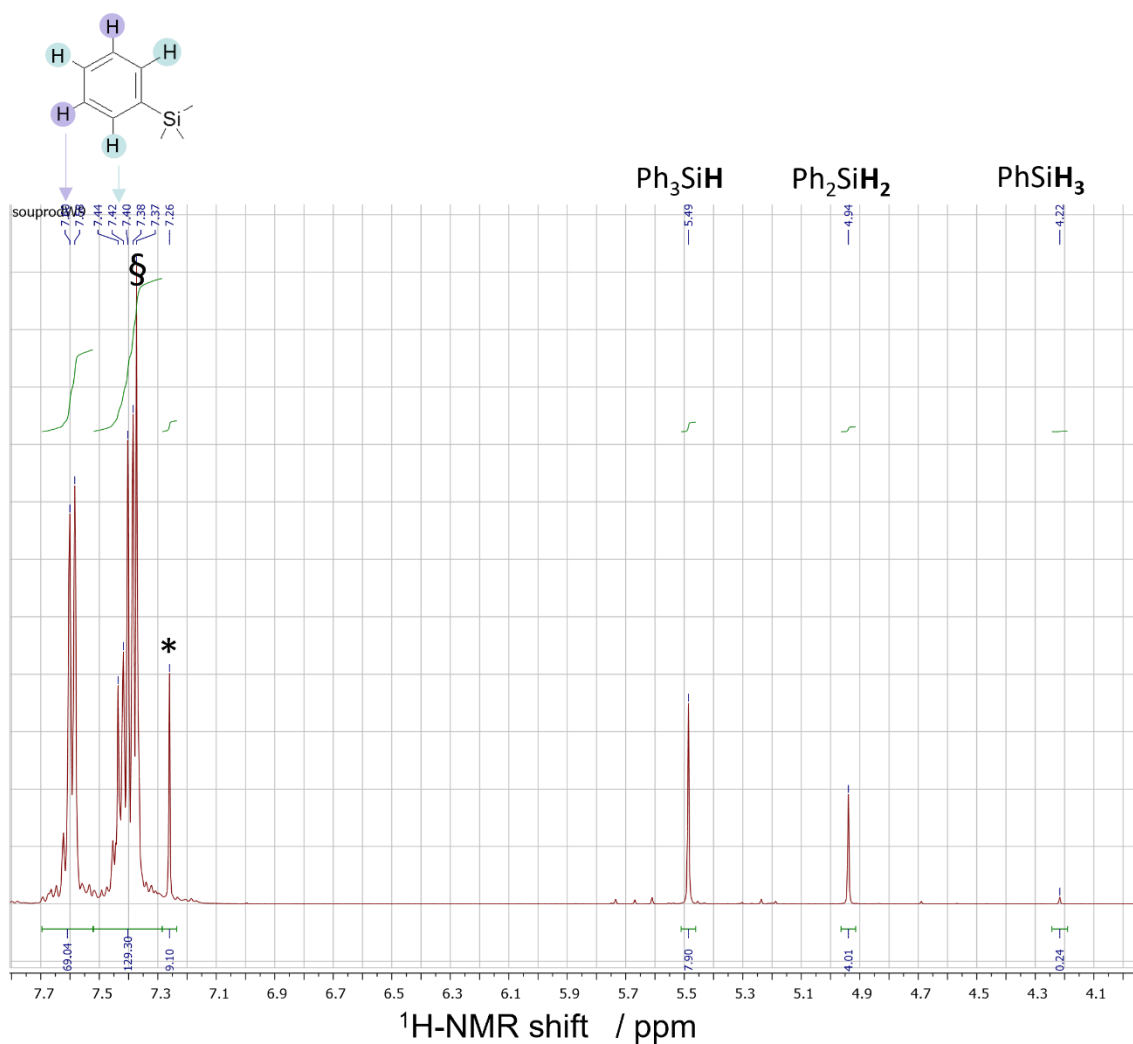

**Figure S1.**  $^1\text{H-NMR}$  spectrum of a diphenylsilane sample after incubation at  $400^\circ\text{C}$ . Relaxation time  $T_1$  was set to 1 minute which was found long enough for the complete relaxation of all protons in the mixture. Phenylsilane, diphenylsilane and triphenylsilane were quantified from the integral of their characteristic Si-H peaks at 4.2, 4.9 and 5.4 ppm respectively. The expected intensity of the aromatic peaks from these species was calculated from this quantitation and subtracted from the measured integrals of the aromatic cluster at 7.65 ppm. This value was used to quantify tetraphenylsilane. The expected integral of the aromatic peaks in the cluster at 7.4 ppm for all silane species was subtracted from the measured integral. This value was used to quantify the amount of benzene, which gives a single peak at 7.37 ppm (§). The presence of benzene was further checked by  $^{13}\text{C}$  NMR, on which the benzene signal does not super-impose with the peaks from the silane phenyls. (\*)  $\text{CHCl}_3$ .

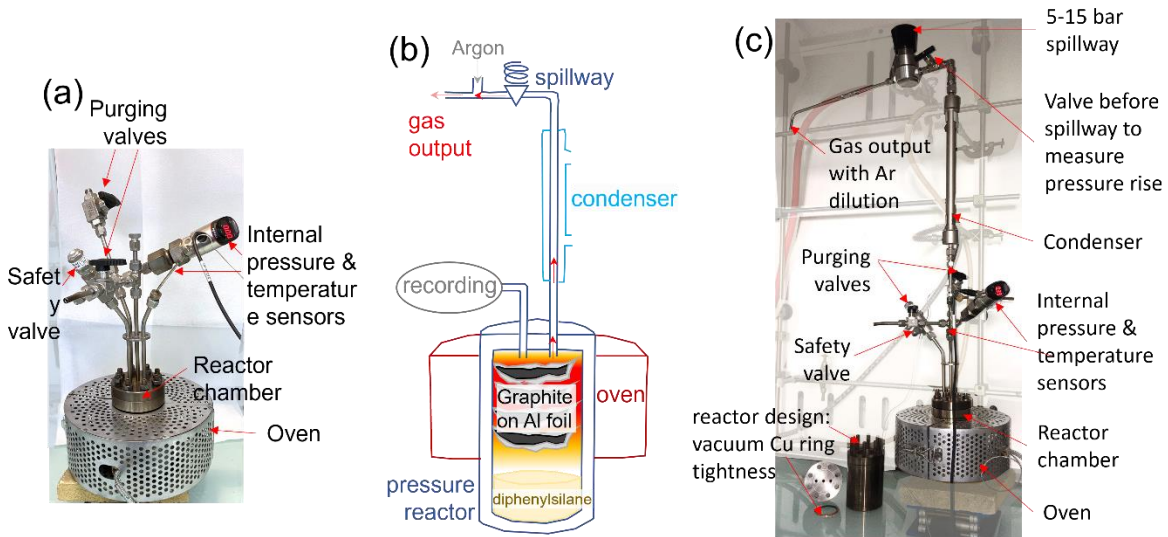

**Figure S2:** Pressure reactor scheme and photographs: (a) closed reactor, (b,c) half-open reactor. (b) Scheme of the half-open reactor design for GtSi synthesis, including the reaction chamber, connections to the pressure and temperature recording, a pipe to the exhaust through a water-cooled condenser and a spillway. The exhaust gas is diluted with a neutral gas before escaping to the hood venting. The stock of diphenylsilane at the bottom of the chamber lays below the heated zone. The graphite with SnS seeds is introduced on aluminum foil in the heated zone.

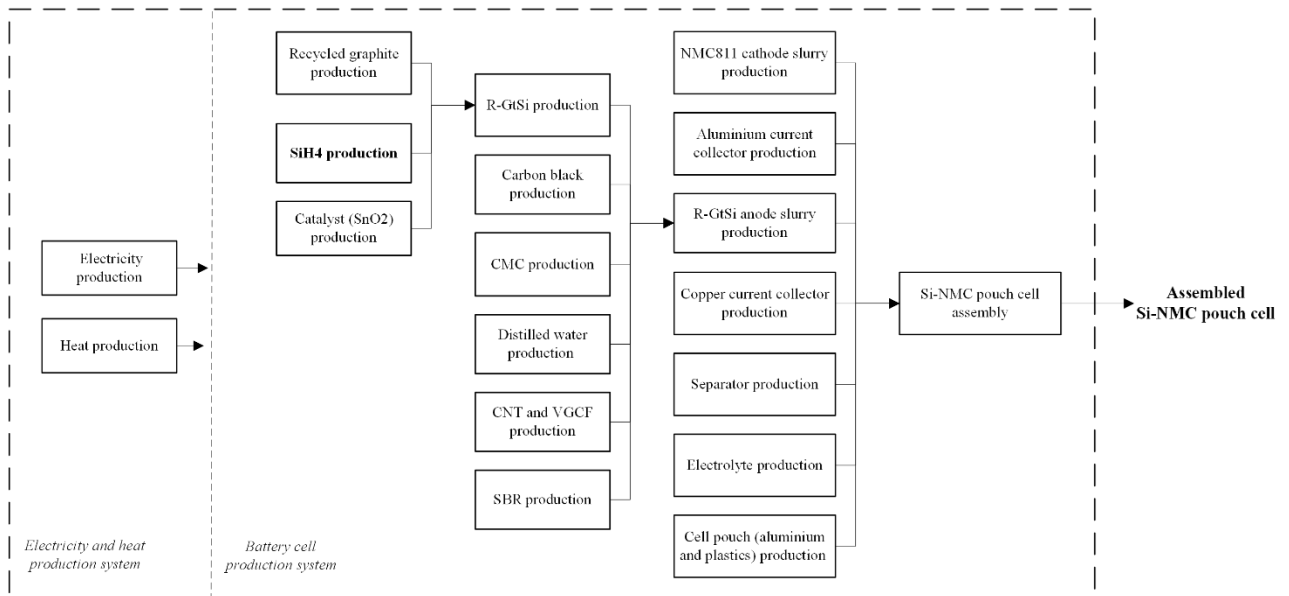

**Figure S3.** System boundary for the Life Cycle Assessment (LCA) of the 40 mAh Si-NMC single-layer pouch cell.

**Table S1:** elemental analysis by quantitative Emission Dispersion Spectroscopy (EDS) Gt and Rec-Gt

| Weight %          | C    | O   | Al   | Si   | Ni   | Co   | Na   | Fe   |
|-------------------|------|-----|------|------|------|------|------|------|
| Recycled graphite | 94.7 | 4.1 | 0.13 | 0.02 | 0.85 | 0.05 | 0.05 | 0.01 |

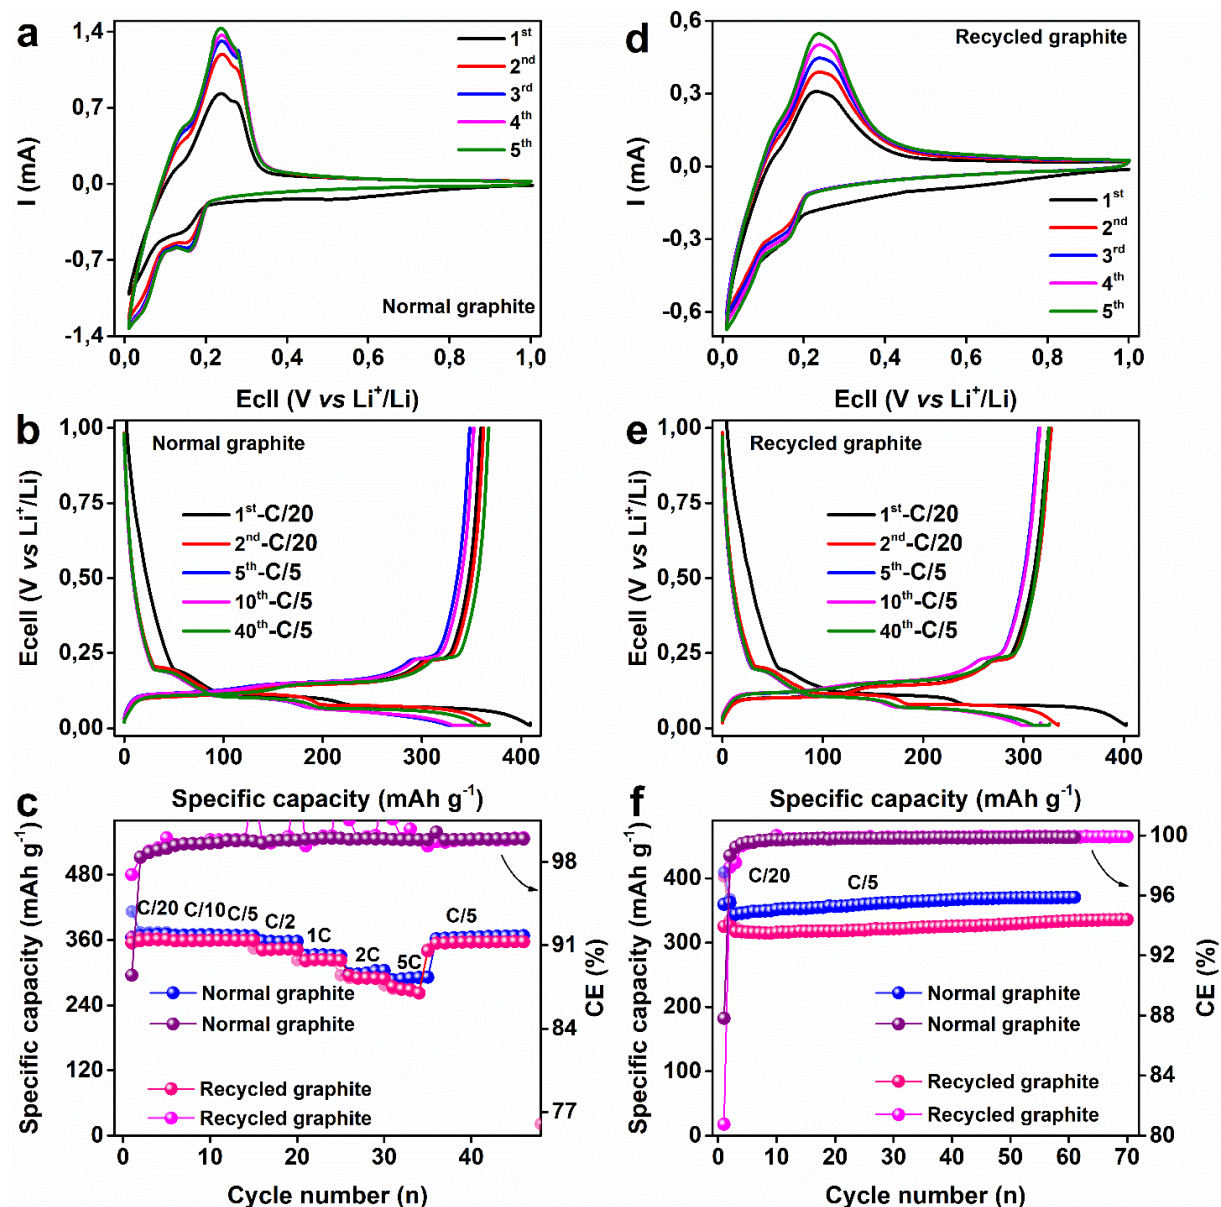**Figure S4:** Electrochemical performance: (a, b) and (d, e) represent CV and discharge/charge curves of normal graphite and recycled graphite, respectively; (c) represents C-rate and (e) long cycle behaviors at C/5 with 3 initial cycles at C/20 of normal graphite and recycled graphite.

Aqueous slurry preparation: 80% active material, 10% super P, and 10% of Na-CMC ; Mass loading: graphite cell (b, f) = 2.16 mg.cm<sup>-2</sup> (c) = 2.10 mg.cm<sup>-2</sup>; Recycled graphite cell (e, f) = 2.23 mg.cm<sup>-2</sup> (c) = 2.32 mg.cm<sup>-2</sup>; Working electrode: disk of 14 mm diameter ; Electrolyte: 1 M of LiPF<sub>6</sub> in EC/DEC (1:1); Separator: Celgard 2500, disk of 18 mm diameter;; Potential window: 0.01-1 V

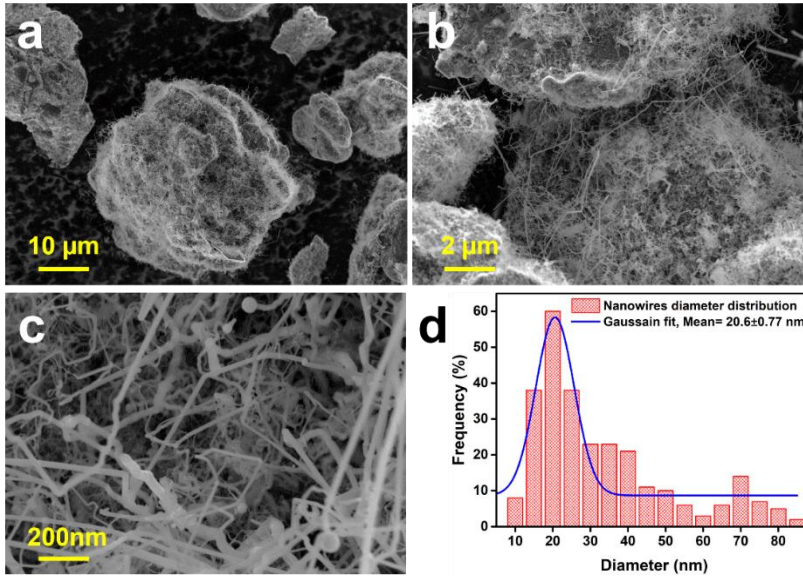

**Figure S5:** Scanning electron microscopy (SEM) images of GtSi composites at different magnification (a, b, c). (d) Diameter distribution of Si nanowires, showing a preferential diameter of 20 +/- 1 nm.

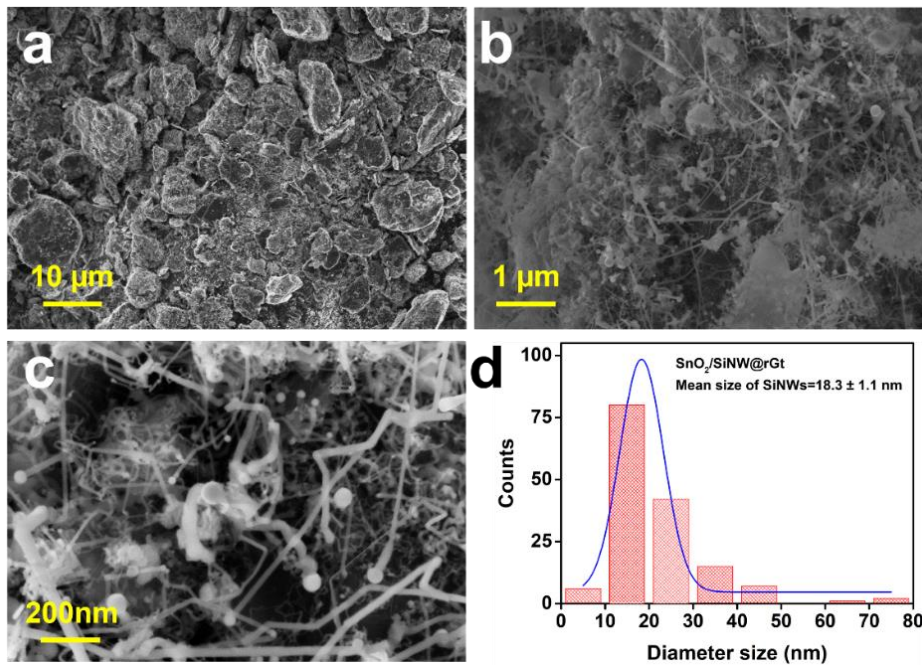

**Figure S6:** SEM images of Rec-GtSi composites at different magnification (a, b, c). (d) Diameter distribution of Si nanowires, showing a preferential diameter of 18 +/- 1 nm.

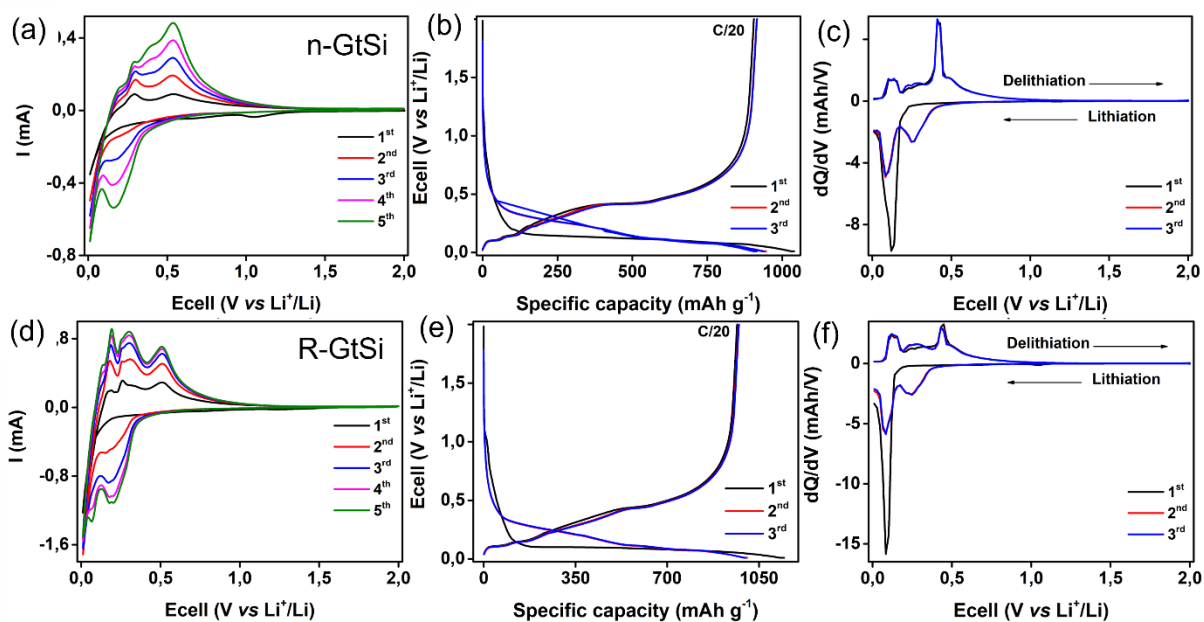

**Figure S7.** Electrochemical characterization of n-GtSi (a-c) and R-GtSi (d-f) anode materials in coin cells in half-cell configuration: cyclic voltammograms (a,d), specific capacity vs potential (b,e) and corresponding incremental capacity (c,f). The electrolyte was 1 M of LiPF<sub>6</sub> in EC/DMC/EMC 1:1:1 + 10% FEC. 14 mm diameter electrode disks were prepared from a slurry 80% active material, 10% super P, and 10% of CMC in deionized water. Mass loading of active material was 2.23 mg.cm<sup>-2</sup>. Potential window 0.01 to 2 V vs Li<sup>+</sup>/Li.

**Table S2.** Composition in molar percentage of samples of **diphenylsilane** after thermal decomposition at 300°C and 400°C as a function of time, as determined by <sup>1</sup>H-NMR. The value for SiH<sub>4</sub> is an estimate using mass conservation law.

| hours at 300°C | Ph <sub>4</sub> Si | Ph <sub>3</sub> SiH | Ph <sub>2</sub> SiH <sub>2</sub> | PhSiH <sub>3</sub> | SiH <sub>4</sub> | benzene  |
|----------------|--------------------|---------------------|----------------------------------|--------------------|------------------|----------|
| 0              | -0.5 ± 0.5         | 0                   | 100.5 ± 1                        | 0                  | 0                | 0        |
| 1              | 1.1 ± 0.1          | 9.5 ± 0.4           | 79.2 ± 1                         | 9.5 ± 0.2          | 0.7 ± 2          | 0.8 ± 1  |
| 3              | 0.6 ± 0.1          | 13.2 ± 0.5          | 73.4 ± 1                         | 12.7 ± 0.3         | 0.1 ± 2          | 1.5 ± 1  |
| 6.8            | 1.2 ± 0.1          | 15.2 ± 0.6          | 68.9 ± 1                         | 14.2 ± 0.3         | 0.5 ± 2          | 2.3 ± 1  |
| 25             | 3.6 ± 0.4          | 32.2 ± 0.9          | 44.7 ± 0.6                       | 20.9 ± 0.4         | -1.3 ± 2         | 20.9 ± 2 |
| 40             | 5.6 ± 0.4          | 42.2 ± 0.9          | 22.0 ± 0.4                       | 17.6 ± 0.4         | 12.6 ± 3         | 12.2 ± 2 |
| hours at 400°C |                    |                     |                                  |                    |                  |          |
| 0.5            | 2.5 ± 0.2          | 27.4 ± 0.8          | 45.6 ± 1                         | 19.8 ± 0.5         | 4.7 ± 2          | 3.0 ± 1  |
| 1              | 3.0 ± 0.3          | 31.0 ± 0.9          | 39.7 ± 1                         | 19.6 ± 0.5         | 6.7 ± 3          | 4.0 ± 1  |
| 3              | 7.5 ± 0.6          | 37.6 ± 0.9          | 24.9 ± 0.7                       | 11.7 ± 0.4         | 18.2 ± 3         | 4.5 ± 1  |
| 8.5            | 13.8 ± 0.6         | 35.9 ± 0.9          | 18.2 ± 0.6                       | 6.7 ± 0.4          | 25.5 ± 3         | 5.9 ± 1  |

**Table S3.** Composition in molar percentage of samples of **phenylsilane** after thermal decomposition at 300°C and 400°C as a function of time, as determined by <sup>1</sup>H-NMR. The value for SiH<sub>4</sub> is an estimate using mass conservation law.

| hours at 300°C | Ph <sub>4</sub> Si | Ph <sub>3</sub> SiH | Ph <sub>2</sub> SiH <sub>2</sub> | PhSiH <sub>3</sub> | SiH <sub>4</sub> | benzene |
|----------------|--------------------|---------------------|----------------------------------|--------------------|------------------|---------|
| 0              | 0                  | 0                   | 0                                | 99.9 ± 1           | 0                | 0       |
| 2              | 0.2 ± 0.1          | 0.4 ± 0.1           | 3.5 ± 0.1                        | 90.3 ± 0.9         | 5.5 ± 2          | 0.6 ± 1 |
| 8              | 0.3 ± 0.1          | 1.4 ± 0.1           | 12.9 ± 0.2                       | 66.5 ± 0.7         | 18.9 ± 2         | 2.7 ± 1 |
| 16             | 0.9 ± 0.1          | 2.5 ± 0.1           | 15.5 ± 0.3                       | 56.9 ± 0.6         | 24.2 ± 2         | 1.3 ± 1 |
| 31             | 0.6 ± 0.1          | 2.9 ± 0.1           | 16.0 ± 0.3                       | 55.5 ± 0.5         | 25.0 ± 2         | 1.8 ± 1 |
| 65             | 0.6 ± 0.1          | 4.4 ± 0.2           | 18.5 ± 0.4                       | 46.4 ± 0.4         | 30.2 ± 3         | 1.6 ± 1 |
| hours at 400°C |                    |                     |                                  |                    |                  |         |
| 0.5            | 1.3 ± 0.1          | 4.7 ± 0.2           | 22.9 ± 0.4                       | 32.7 ± 0.3         | 38.8 ± 2         | 3.0 ± 1 |
| 1              | 1.7 ± 0.2          | 5.9 ± 0.3           | 22.2 ± 0.4                       | 29.6 ± 0.3         | 40.8 ± 4         | 1.9 ± 1 |
| 3              | 2.5 ± 0.2          | 12.8 ± 0.5          | 18.4 ± 0.4                       | 11.3 ± 0.1         | 55.4 ± 5         | 4.5 ± 1 |
| 8.5            | 1.4 ± 0.1          | 16.4 ± 0.6          | 16.8 ± 0.3                       | 8.4 ± 0.1          | 57.6 ± 5         | 4.6 ± 1 |

**Table S4.** Composition in molar percentage of samples of **triphenylsilane** after thermal decomposition at 300°C and 400°C as a function of time, as determined by <sup>1</sup>H-NMR. The value for SiH<sub>4</sub> is an estimate using mass conservation law.

| hours at 300°C | Ph <sub>4</sub> Si | Ph <sub>3</sub> SiH | Ph <sub>2</sub> SiH <sub>2</sub> | PhSiH <sub>3</sub> | SiH <sub>4</sub> | benzene  |
|----------------|--------------------|---------------------|----------------------------------|--------------------|------------------|----------|
| 0              | 0.6 ± 0.5          | 99.4 ± 1            | 0                                | 0                  | 0                | 0        |
| 2              | 2.8 ± 0.2          | 96.8 ± 1            | 1.1 ± 0.1                        | 0.0 ± 0.1          | -0.7 ± 2         | 0.6 ± 1  |
| 16             | 2.3 ± 0.2          | 96.9 ± 1            | 1.5 ± 0.1                        | 0.0 ± 0.1          | -0.7 ± 2         | 1.3 ± 1  |
| 31             | 5.8 ± 0.5          | 90.5 ± 0.9          | 3.8 ± 0.2                        | 0.2 ± 0.1          | -0.3 ± 2         | 1.8 ± 1  |
| 65             | 16.4 ± 0.8         | 74.0 ± 0.7          | 7.0 ± 0.3                        | 0.8 ± 0.1          | 1.8 ± 2          | 1.6 ± 1  |
| hours at 400°C |                    |                     |                                  |                    |                  |          |
| 1              | 3.8 ± 0.3          | 93.2 ± 1.0          | 2.7 ± 0.1                        | 0.1 ± 0.05         | 0.2 ± 2          | 0.8 ± 1  |
| 3              | 21.8 ± 0.7         | 63.4 ± 0.8          | 11.1 ± 0.3                       | 1.5 ± 0.1          | 2.3 ± 2          | 1.7 ± 1  |
| 8.5            | 33.5 ± 0.9         | 48.0 ± 0.6          | 11.3 ± 0.3                       | 2.4 ± 0.1          | 4.8 ± 2          | 6.3 ± 1  |
| 15             | 39.7 ± 1           | 44.7 ± 0.6          | 8.1 ± 0.2                        | 1.2 ± 0.1          | 6.2 ± 3          | 21.1 ± 2 |

### Note S1. Determination of rate constants of phenyl/hydride exchange between phenylsilane species

The expected reactions for the thermal decomposition of mono-, di- and tri-phenylsilane are the following equilibria of phenyl and hydride exchange:

| Reactions                                              |   |                                                      | Equilibrium constant | Forward reaction rate                                          |                 |
|--------------------------------------------------------|---|------------------------------------------------------|----------------------|----------------------------------------------------------------|-----------------|
| 2 SiPh <sub>2</sub> H <sub>2</sub>                     | ⇌ | SiPhH <sub>3</sub> + SiPh <sub>3</sub> H             | (3)                  | K <sub>2</sub>                                                 | p <sub>2</sub>  |
| SiPhH <sub>3</sub> + SiPh <sub>2</sub> H <sub>2</sub>  | ⇌ | SiH <sub>4</sub> + SiPh <sub>3</sub> H               | (4)                  | K <sub>12</sub> = K <sub>1</sub> K <sub>2</sub>                | p <sub>12</sub> |
| SiPhH <sub>3</sub> + SiPh <sub>3</sub> H               | ⇌ | SiH <sub>4</sub> + SiPh <sub>4</sub>                 | (5)                  | K <sub>13</sub> = K <sub>1</sub> K <sub>2</sub> K <sub>3</sub> | p <sub>13</sub> |
| 2 SiPhH <sub>3</sub>                                   | ⇌ | SiH <sub>4</sub> + SiPh <sub>2</sub> H <sub>2</sub>  | (6)                  | K <sub>1</sub>                                                 | p <sub>1</sub>  |
| SiPh <sub>2</sub> H <sub>2</sub> + SiPh <sub>3</sub> H | ⇌ | SiPh <sub>4</sub> + SiPhH <sub>3</sub>               | (7)                  | K <sub>23</sub> = K <sub>2</sub> K <sub>3</sub>                | p <sub>23</sub> |
| 2 SiPh <sub>3</sub> H                                  | ⇌ | SiPh <sub>4</sub> + SiPh <sub>2</sub> H <sub>2</sub> | (8)                  | K <sub>3</sub>                                                 | p <sub>3</sub>  |

To simplify notations, we introduce short names for the five species as follows: the concentrations in SiH<sub>4</sub>, SiPhH<sub>3</sub>, SiPh<sub>2</sub>H<sub>2</sub>, SiPh<sub>3</sub>H and SiPh<sub>4</sub> are noted C<sub>0</sub>, C<sub>1</sub>, C<sub>2</sub>, C<sub>3</sub>, and C<sub>4</sub> respectively. They are expected to follow the rate laws as:

$$\frac{dC_0}{dt} = p_{12}C_1C_2 - \frac{p_{12}}{K_{12}}C_0C_3 + p_1C_1^2 - \frac{p_1}{K_1}C_0C_2 + p_{13}C_1C_3 - \frac{p_{13}}{K_{13}}C_0C_4$$

$$\frac{dC_1}{dt} = p_2C_2^2 - \frac{p_2}{K_2}C_1C_3 - p_{12}C_1C_2 + \frac{p_{12}}{K_{12}}C_0C_3 - 2p_1C_1^2 + 2\frac{p_1}{K_1}C_0C_2 + p_{23}C_2C_3 - \frac{p_{23}}{K_{23}}C_1C_4 - p_{13}C_1C_3 + \frac{p_{13}}{K_{13}}C_0C_4$$

$$\frac{dC_2}{dt} = -2p_2C_2^2 + 2\frac{p_2}{K_2}C_1C_3 - p_{12}C_1C_2 + \frac{p_{12}}{K_{12}}C_0C_3 + p_1C_1^2 - \frac{p_1}{K_1}C_0C_2 - p_{23}C_2C_3 + \frac{p_{23}}{K_{23}}C_1C_4 + p_3C_3^2 - \frac{p_3}{K_3}C_2C_4$$

$$\frac{dC_3}{dt} = p_2C_2^2 - \frac{p_2}{K_2}C_1C_3 + p_{12}C_1C_2 - \frac{p_{12}}{K_{12}}C_0C_3 - p_{23}C_2C_3 + \frac{p_{23}}{K_{23}}C_1C_4 - 2p_3C_3^2 + 2\frac{p_3}{K_3}C_2C_4 - p_{13}C_1C_3 + \frac{p_{13}}{K_{13}}C_0C_4$$

$$\frac{dC_4}{dt} = p_{23}C_2C_3 - \frac{p_{23}}{K_{23}}C_1C_4 + p_3C_3^2 - \frac{p_3}{K_3}C_2C_4 + p_{13}C_1C_3 - \frac{p_{13}}{K_{13}}C_0C_4$$

The 15 concentration profiles over time (5 species, 3 initial conditions) were simulated with a time step of 1 minute, and fitted simultaneously to the 15 experimental concentration profiles. The 9 parameters K<sub>1</sub>, K<sub>2</sub>, K<sub>3</sub>, p<sub>2</sub>, p<sub>12</sub>, p<sub>13</sub>, p<sub>1</sub>, p<sub>23</sub> and p<sub>3</sub> were optimized for the best fit. The corresponding rate constants are given in Table 1 and Table S4. The fitted concentration profiles are displayed in Figure S7.

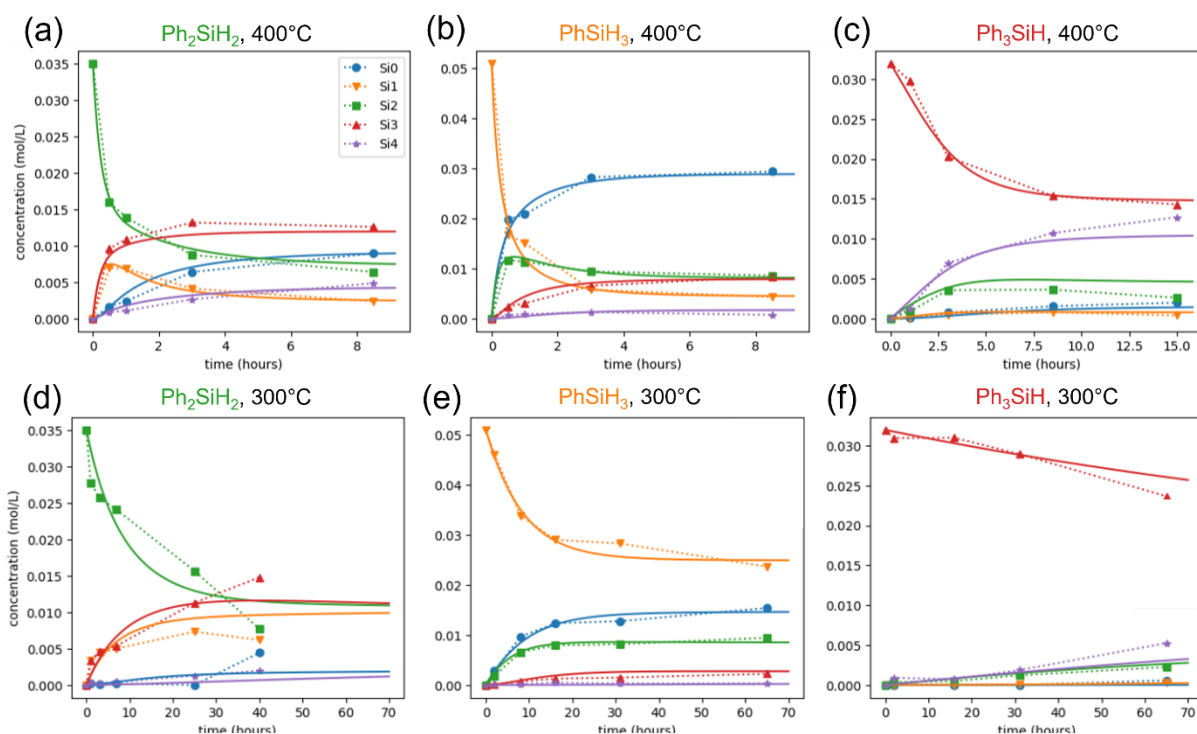

**Figure S8.** Concentration profiles of  $\text{SiH}_4$  (Si0),  $\text{PhSiH}_3$  (Si1),  $\text{Ph}_2\text{SiH}_2$  (Si2),  $\text{Ph}_3\text{SiH}$  (Si3) and  $\text{PH}_4\text{Si}$  (Si4) as a function of incubation time at 400°C (a, b, c) and 300°C (d, e, f) for samples of initially pure diphenylsilane (a,d), phenylsilane (b,e) and triphenylsilane (c,f). The lines show best fits for the chemical dynamics model as detailed in Note S1. Best fitting parameters are disclosed in Table S5.

**Table S5.** Rate constants of forward and reverse reactions (3) to (8) from best fit with experimental concentration profiles over time. (ND: could not be determined).

| 400°C                  |                                                        | Species giving phenyl and gaining hydride |                           |                         |                        |
|------------------------|--------------------------------------------------------|-------------------------------------------|---------------------------|-------------------------|------------------------|
|                        | ( $\text{L}\cdot\text{mol}^{-1}\cdot\text{min}^{-1}$ ) | $\text{PhSiH}_3$                          | $\text{Ph}_2\text{SiH}_2$ | $\text{Ph}_3\text{SiH}$ | $\text{Ph}_4\text{Si}$ |
| Species giving hydride | $\text{SiH}_4$                                         |                                           | 0.043                     | 0.041                   | 0.14                   |
| and gaining phenyl     | $\text{PhSiH}_3$                                       | 0.51                                      |                           | 1.1                     | 2.3                    |
|                        | $\text{Ph}_2\text{SiH}_2$                              | 0.26                                      | 0.53                      |                         | 1.5                    |
|                        | $\text{Ph}_3\text{SiH}$                                | 0.19                                      | 0.27                      | 0.033                   |                        |
| 300°C                  |                                                        | Species giving phenyl and gaining hydride |                           |                         |                        |
|                        | ( $\text{L}\cdot\text{mol}^{-1}\cdot\text{min}^{-1}$ ) | $\text{PhSiH}_3$                          | $\text{Ph}_2\text{SiH}_2$ | $\text{Ph}_3\text{SiH}$ | $\text{Ph}_4\text{Si}$ |
| Species giving hydride | $\text{SiH}_4$                                         |                                           | 0.05                      | 0.07                    | ND                     |
| and gaining phenyl     | $\text{PhSiH}_3$                                       | 0.010                                     |                           | 0.19                    | ND                     |
|                        | $\text{Ph}_2\text{SiH}_2$                              | 0.012                                     | 0.020                     |                         | ND                     |
|                        | $\text{Ph}_3\text{SiH}$                                | ND                                        | ND                        | 0.001                   |                        |

**Note S2.** Estimation of non-ideal behavior of phenylsilane and diphenylsilane vapors in the growth conditions.

The ideal gas law, that describes the behavior of gases in the limit of non-interacting molecules, must be corrected at high pressure and temperature, in particular for large molecules. The van der Waals equation for real gases takes into account the effect of intermolecular interactions and molecular size through parameters  $a$  and  $b$ , respectively, as follows:

$$\left(P + a \frac{n^2}{V^2}\right)(V - nb) = nRT \quad (9)$$

where  $P$  is the pressure,  $V$  the volume,  $T$  the temperature and  $n$  the number of moles of gas molecules. Parameters  $a$  and  $b$  are tabulated for many gases. Although no data are available for phenylsilane and diphenylsilane, approximate values can be found from neighboring compounds like toluene and diphenylmethane. Table S6 reports  $a$  and  $b$  values for the species present in the reactor, or similar compounds. The expected value for  $n$  were calculated from equation (9) at 390°C and 20 bars (as in the closed reactor) and 10 bars (as in the half-open reactor) as if it was the only species in the reactor.

The ratio  $PV/nRT$  is reported in Table S6 as a measurement of ideality: if the molecular interactions are negligible,  $PV/nRT$  is close to 1. Small molecules like hydrogen and silane behave as ideal gases in these pressure and temperature conditions, but larger molecules deviate significantly. The non-ideality of toluene, considered here as a model for the reagent phenylsilane, is significant, but with a twice lower deviation at 10 bars than 20 bars. The predictions for diphenylsilane (approximated by diphenylmethane) are so far away from ideality that a more accurate model than the van der Waals equation would be required.

**Table S6.** Van der Waals constants  $a$  and  $b$  for gas species present in the reactor during growth or for model species (from Reference table A8 in <https://chem.libretexts.org>), and calculated ratio  $PV/nRT$  as an estimate of ideality at 390°C and 20 or 10 bar.

|                  | $a$<br>L <sup>2</sup> .bar/mol <sup>2</sup> | $b$<br>L/mol | $PV/nRT$ |          |
|------------------|---------------------------------------------|--------------|----------|----------|
|                  |                                             |              | @ 20 bar | @ 10 bar |
| H <sub>2</sub>   | 0.24                                        | 0.0265       | 1.01     | 1.00     |
| SiH <sub>4</sub> | 4.38                                        | 0.058        | 0.99     | 1.00     |
| benzene          | 18.24                                       | 0.1193       | 0.92     | 0.96     |
| toluene          | 24.38                                       | 0.1463       | 0.88     | 0.94     |
| diphenylmethane  | 60.46                                       | 0.2798       | 0.17     | 0.09     |

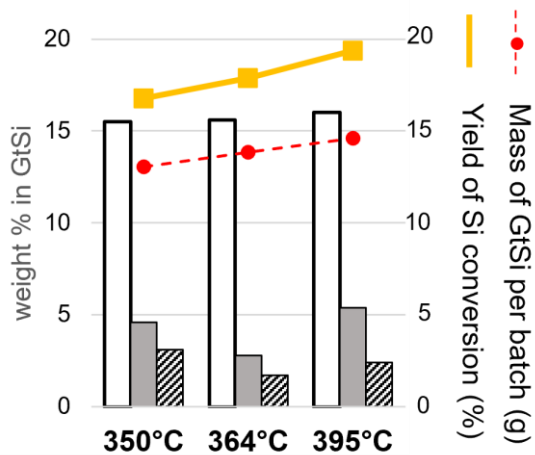

**Figure S9.** Comparison of n-GtSi synthesis mass production, yield of Si conversion and product elemental composition as a function of growth temperature in the closed reactor.

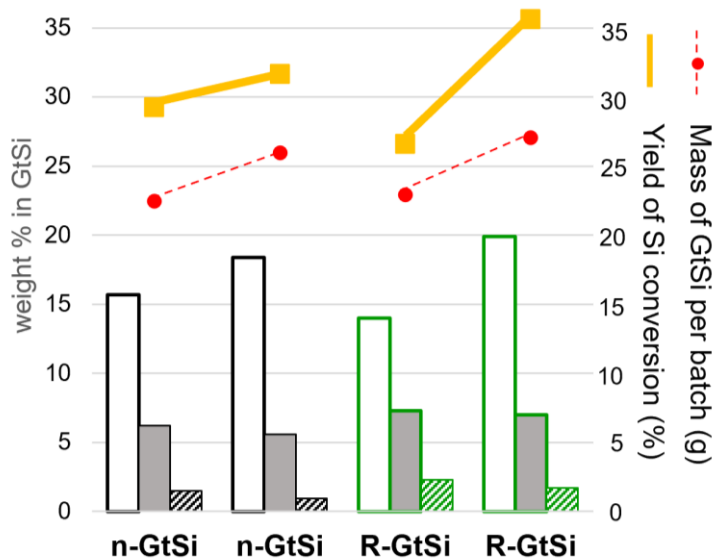

**Figure S10.** Comparison of n-GtSi and R-GtSi synthesis in conditions 7 and 9 described in Figure 4.

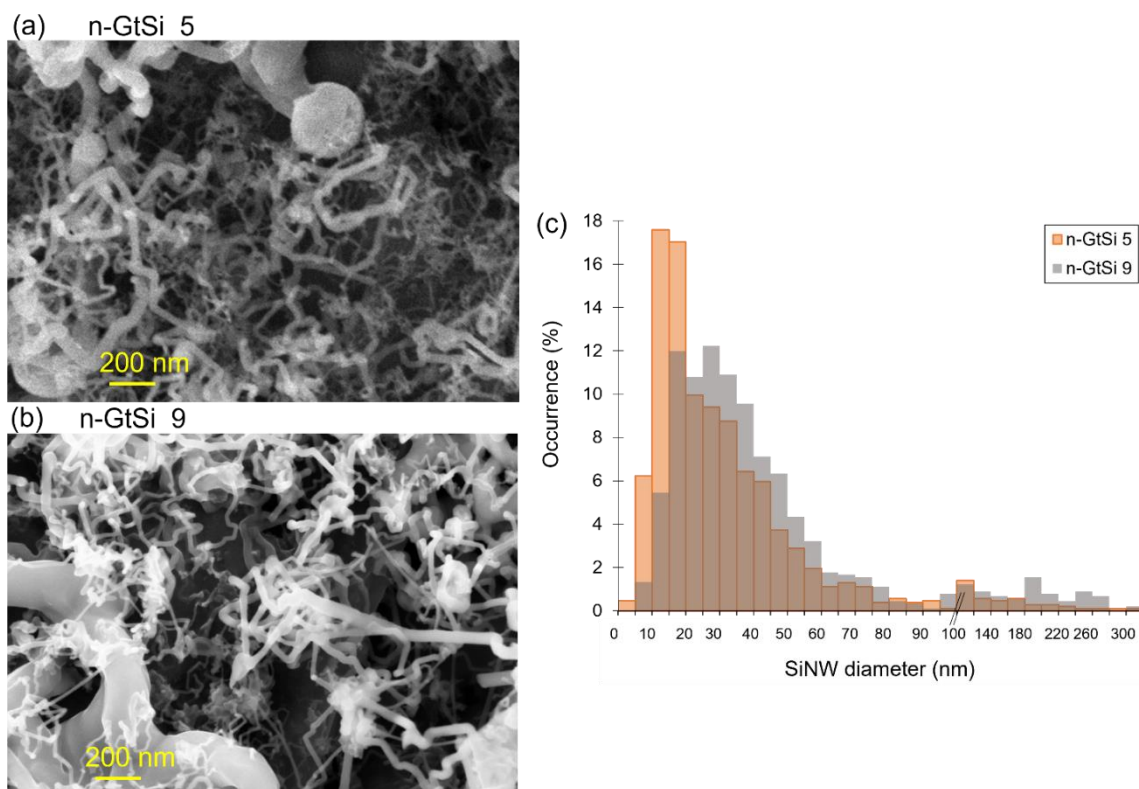

**Figure S11:** (a, b) Scanning electron microscopy (SEM) images of n-GtSi composites from syntheses n°5 (constant temperature growth) and 9 (scaled-up, temperature-ramped growth) as described in Figure 4, and (c) corresponding SiNW diameter distributions (>1000 counts each).

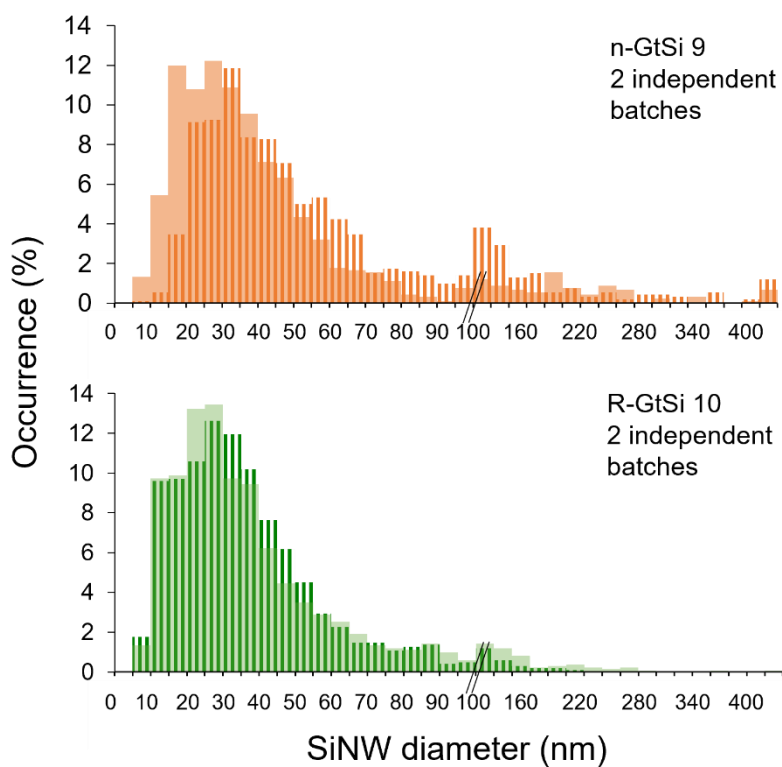

**Figure S12:** Diameter distribution (>1000 counts each) of Si nanowires in n-GtSi and R-GtSi of 4 independent batches obtained from identical synthesis conditions (columns 9 and 10 in Figure 4).

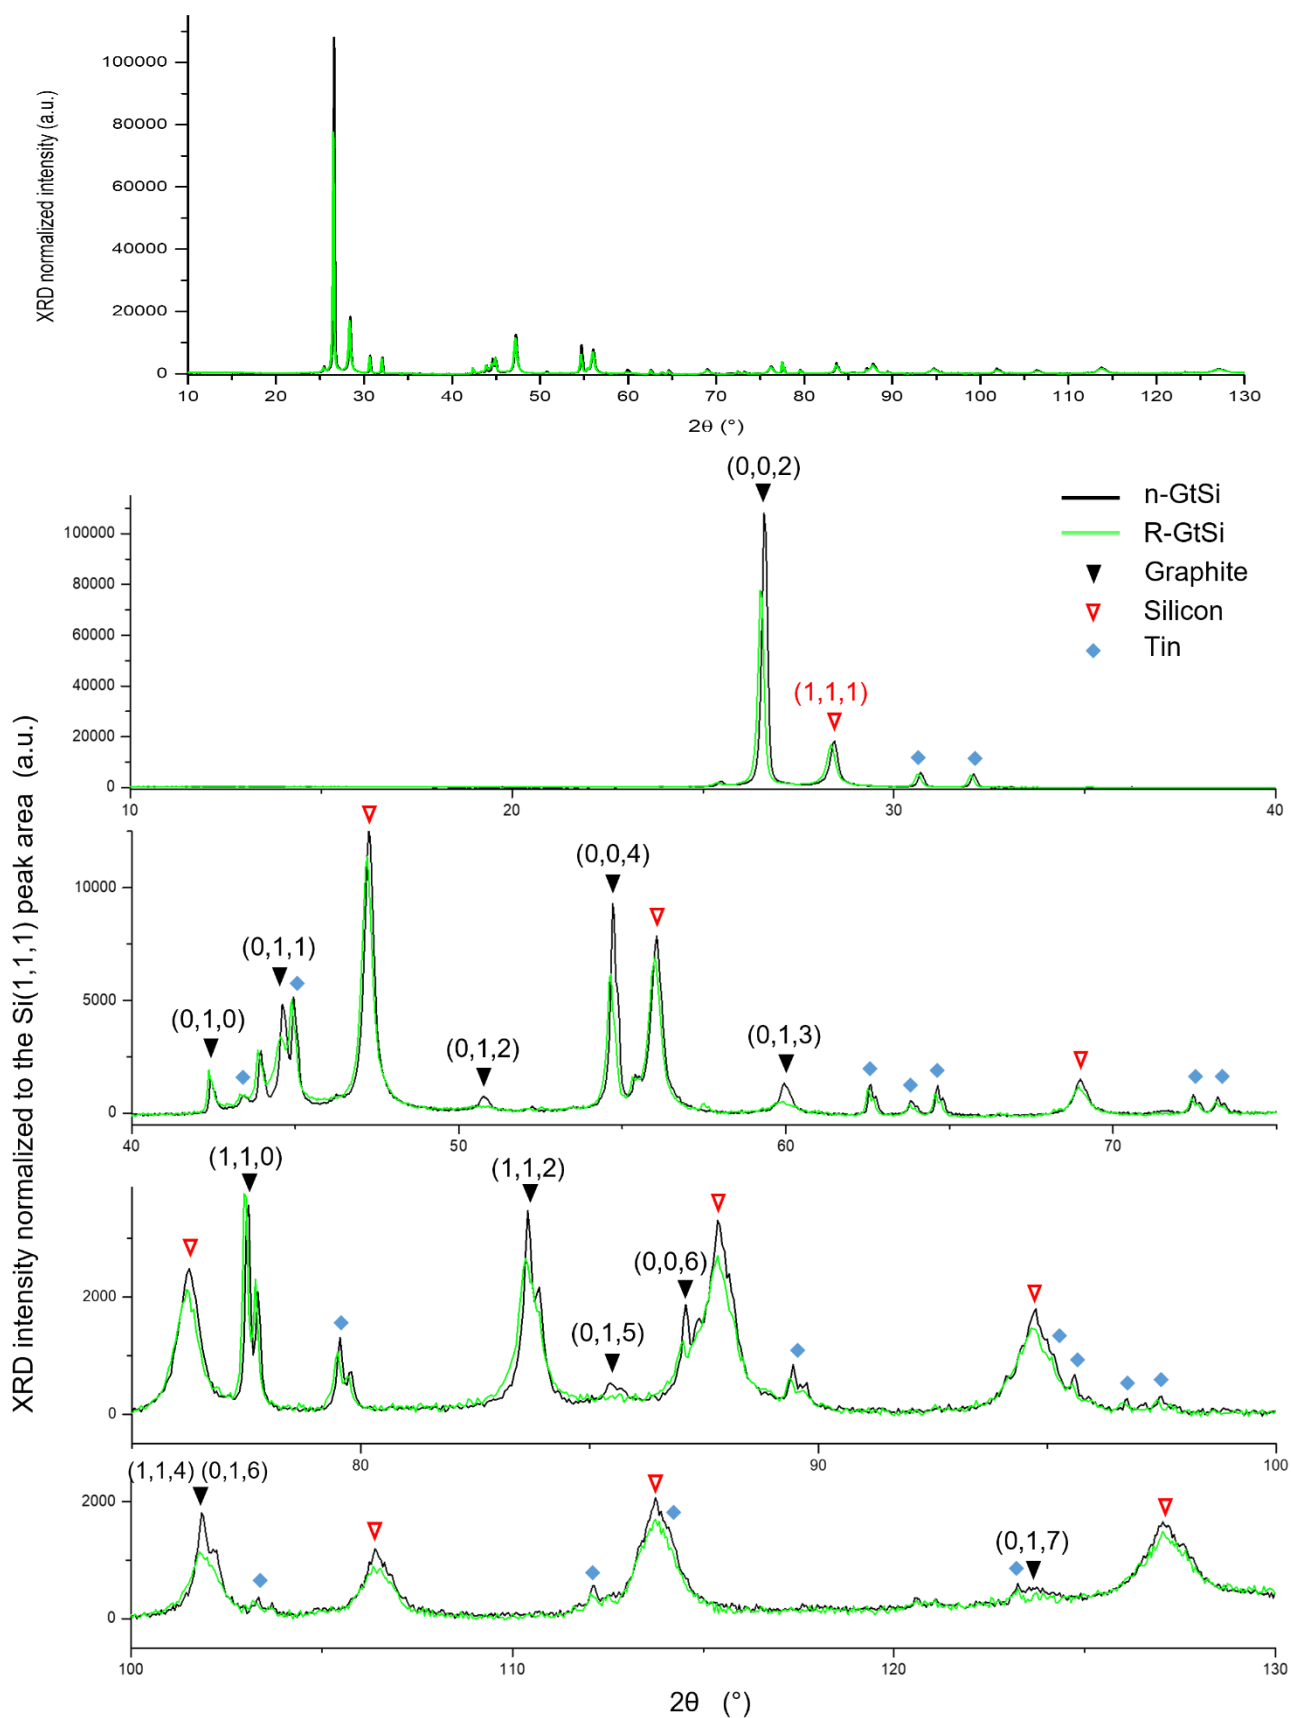

**Figure S13:** X-ray diffractogram of n-GtSi and R-GtSi composites. The intensity was normalized to the area of the Si (1,1,1) reflection. The Leball refinement data are reported in Table S8 and Figures S16, S17 and S18. Reference ICDD files: Tin 00-004-0673 ; Silicon 00-027-1402 ; graphite 00-056-0159.

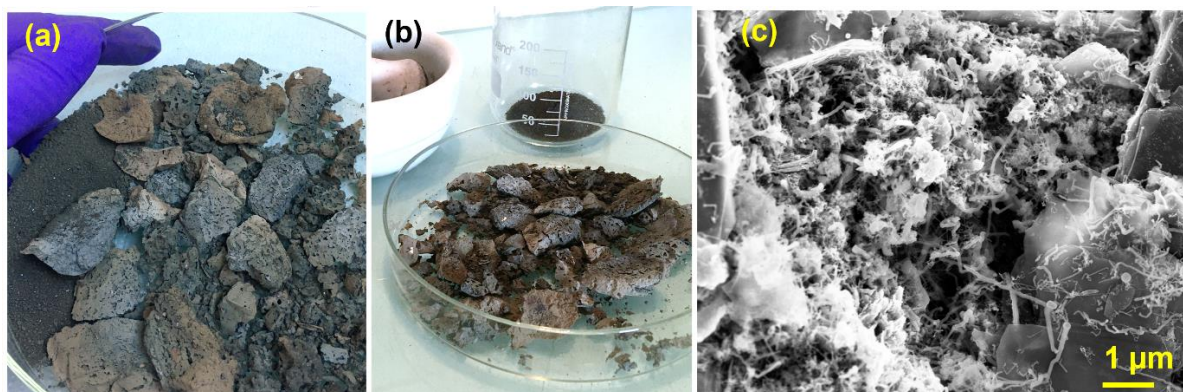

**Figure S14.** (a,b) Photographs of the GtSi raw product; (c) SEM image of GtSi composite showing intertwined SiNWs between neighboring graphite grains.

**Table S7.** Parameters for the calculation of the cell core energy density.

| Mean value on 3 cells (cathode of 10.24 cm <sup>2</sup> ) | Pouch cell Energy discharged at the 1 <sup>st</sup> cycle (mWh) | Cathode thickness* (μm) | Anode thickness* (μm) | Separator thickness (μm) | cell electrochemical core thickness (μm) | Cell core energy density (Wh/L) |
|-----------------------------------------------------------|-----------------------------------------------------------------|-------------------------|-----------------------|--------------------------|------------------------------------------|---------------------------------|
| n-GtSi                                                    | 137.1                                                           | 75                      | 41                    | 20                       | 136                                      | 984                             |
| R-GtSi                                                    | 128.5                                                           | 75                      | 39                    | 20                       | 134                                      | 936                             |

\* Considering one active layer and half of the current collector thickness (Al and Cu foils of 20 and 10μm).

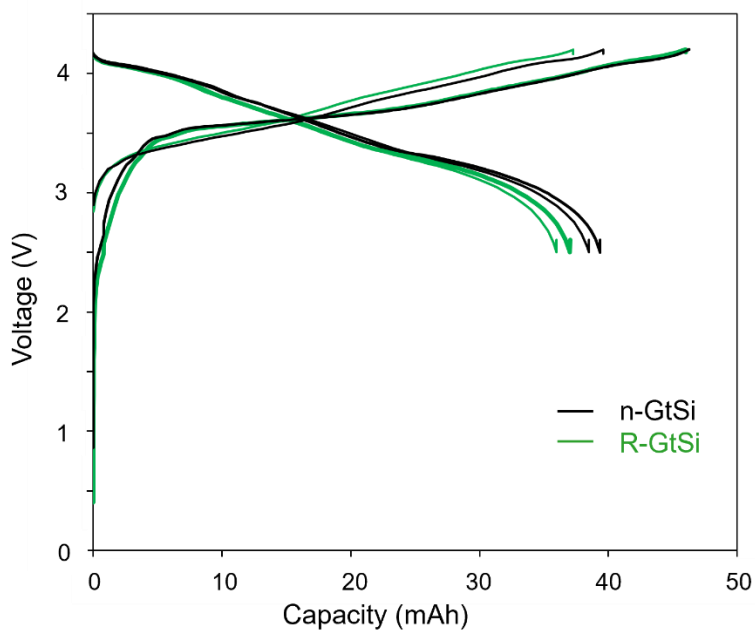

**Figure S15.** Voltage-capacity profiles of the 2 first cycles of SLP cells.

**Table S8.** Le Bail Refinement parameters for samples n-GtSi (W14) and R-GtSi (W16).

|                  | <b>W14</b>                                    | <b>W16</b>                                    |
|------------------|-----------------------------------------------|-----------------------------------------------|
| <b>Graphite</b>  | $a=b=2,4619\pm 0,0001 \text{ \AA}$            | $a=b=2,4609\pm 0,0001 \text{ \AA}$            |
| 194              | $c=6,7125\pm 0,0002 \text{ \AA}$              | $c=6,7144\pm 0,0004 \text{ \AA}$              |
| Hexagonal 6/mmm  | $\alpha=\beta=90^\circ$ et $\gamma=120^\circ$ | $\alpha=\beta=90^\circ$ et $\gamma=120^\circ$ |
| <b>Si</b>        | $a=b=c=5,4466\pm 0,0001 \text{ \AA}$          | $a=b=c=5,4440\pm 0,0002 \text{ \AA}$          |
| 227              | $\alpha=\beta=\gamma=90^\circ$                | $\alpha=\beta=\gamma=90^\circ$                |
| Cubic m-3m       |                                               |                                               |
| <b>Sn</b>        | $a=b=5,8326\pm 0,0002 \text{ \AA}$            | $a=b=5,8307\pm 0,0003 \text{ \AA}$            |
| 141              | $c=3,1821\pm 0,0002 \text{ \AA}$              | $c=3,1809\pm 0,0002 \text{ \AA}$              |
| Tetragonal 4/mmm | $\alpha=\beta=\gamma=90^\circ$                | $\alpha=\beta=\gamma=90^\circ$                |

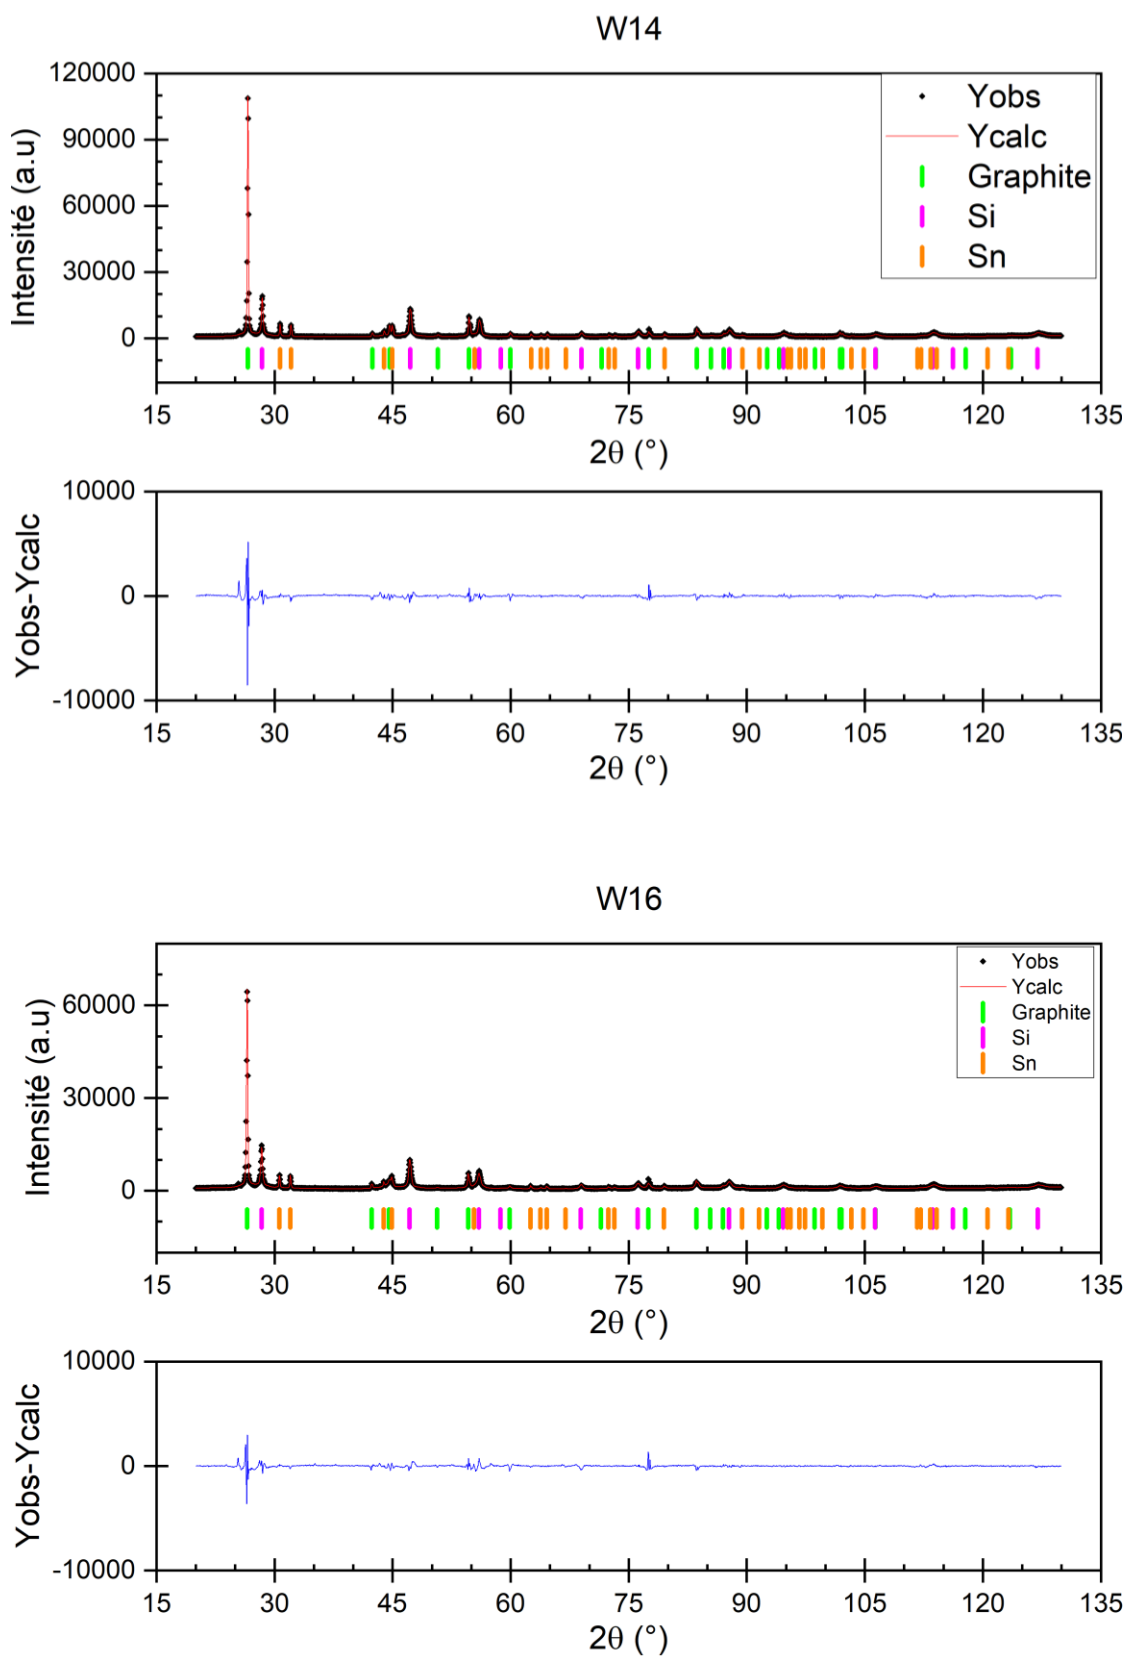

**Figure S16.** Le Bail refinement fitting for samples n-GtSi (W14) and R-GtSi (W16): global views.

W14

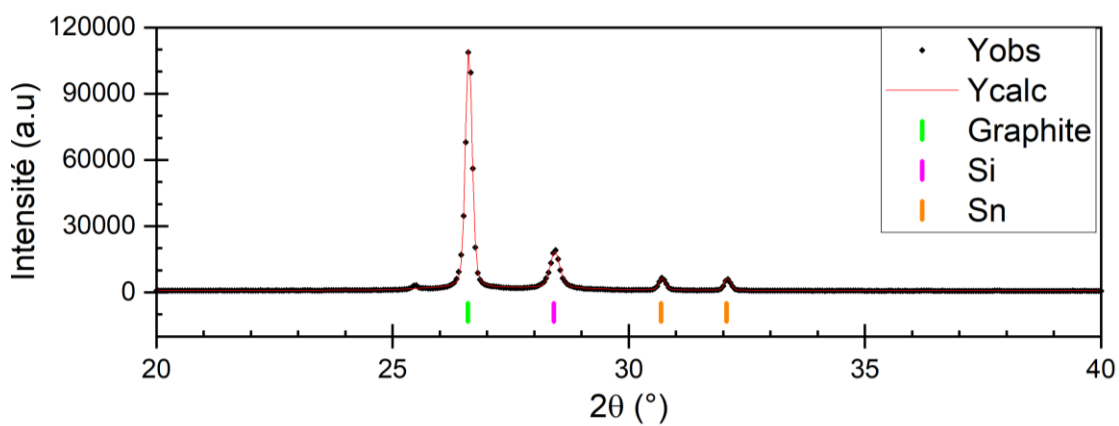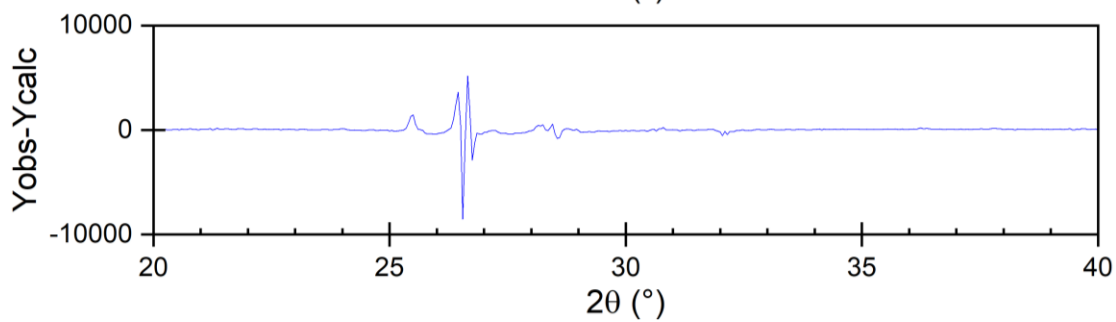

W14

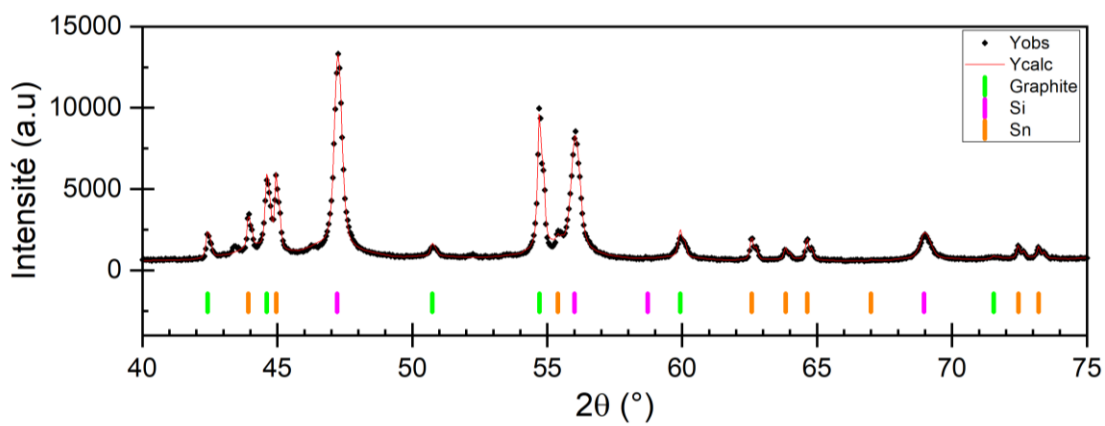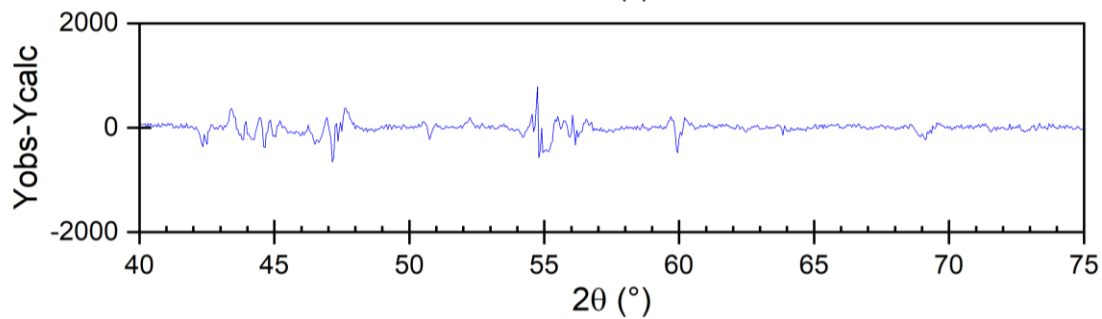

W14

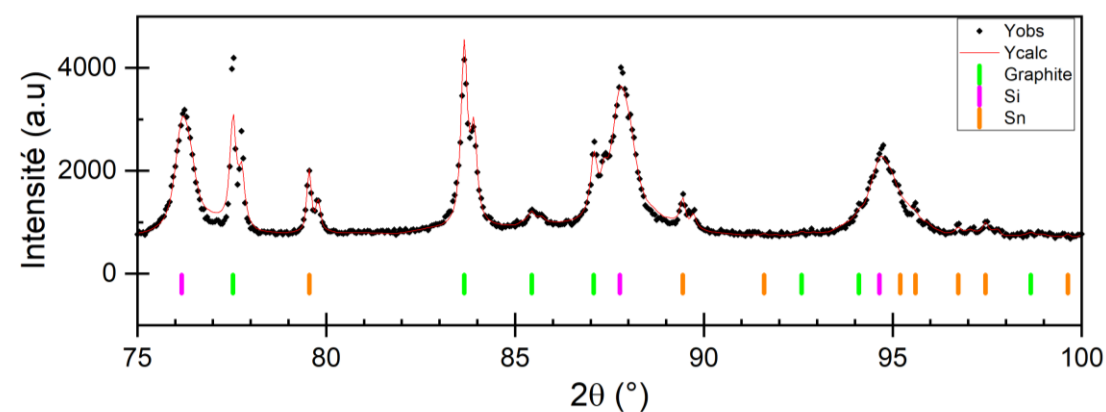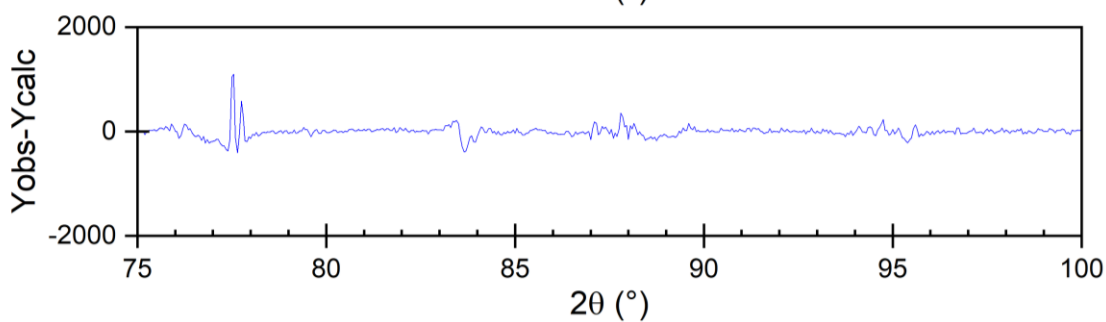

W14

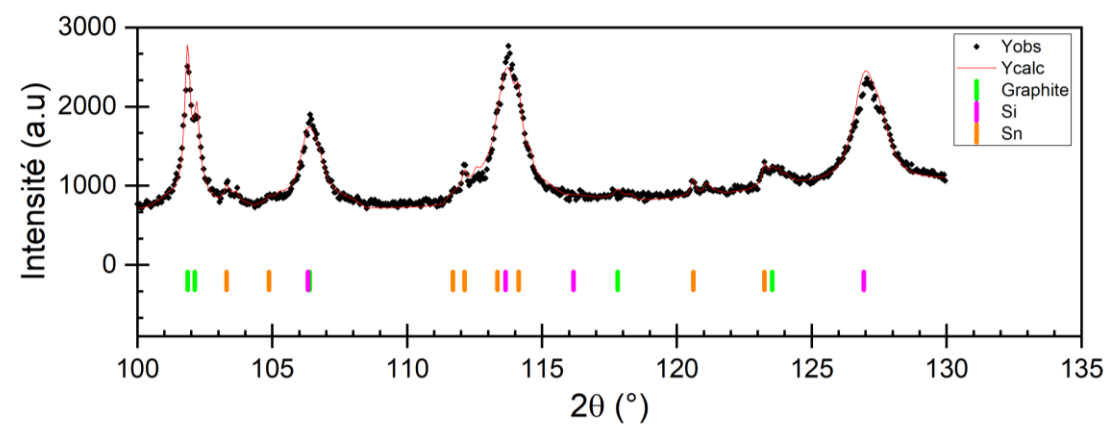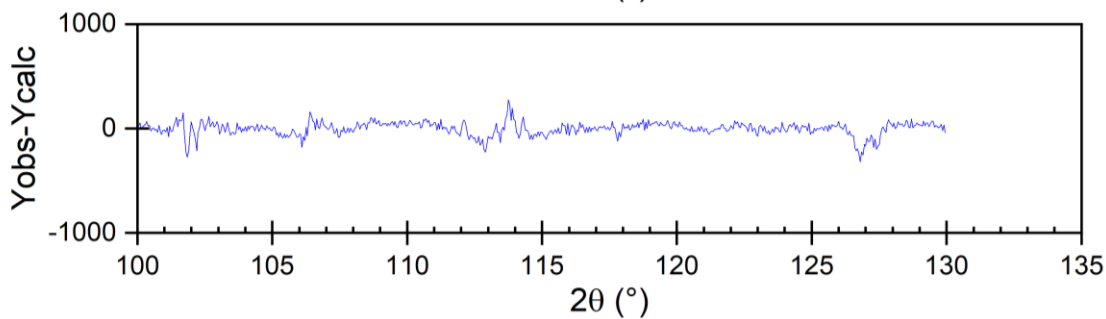

| No. | 2θ (°)  | FWHM (°) | Area calc. | Assignment | h | k | l | Height [cts] | Shape Left |
|-----|---------|----------|------------|------------|---|---|---|--------------|------------|
| 1   | 26,5915 | 0,1443   | 14879,05   | Graphite   | 0 | 0 | 2 | 82664(512)   | 0,454      |
| 2   | 26,6586 | 0,1443   | 7439,53    | Graphite   | 0 | 0 | 2 | 41320(278)   | 0,455      |

|    |         |        |         |          |   |   |   |            |       |
|----|---------|--------|---------|----------|---|---|---|------------|-------|
| 3  | 28,4139 | 0,2208 | 3689,17 | Si       | 1 | 1 | 1 | 12198(281) | 0,691 |
| 4  | 28,4859 | 0,221  | 1844,59 | Si       | 1 | 1 | 1 | 6093(146)  | 0,692 |
| 5  | 30,6864 | 0,1271 | 757,63  | Sn       | 0 | 2 | 0 | 4512(133)  | 0,603 |
| 6  | 30,7644 | 0,1271 | 378,81  | Sn       | 0 | 2 | 0 | 2256(78)   | 0,603 |
| 7  | 32,0694 | 0,1273 | 783,99  | Sn       | 0 | 1 | 1 | 4659(163)  | 0,605 |
| 8  | 32,1511 | 0,1273 | 391,99  | Sn       | 0 | 1 | 1 | 2329(92)   | 0,605 |
| 9  | 42,4134 | 0,1501 | 283,75  | Graphite | 0 | 1 | 0 | 1440(123)  | 0,586 |
| 10 | 42,5237 | 0,1502 | 141,88  | Graphite | 0 | 1 | 0 | 719(70)    | 0,587 |
| 11 | 43,9241 | 0,1294 | 323,62  | Sn       | 2 | 2 | 0 | 1879(104)  | 0,622 |
| 12 | 44,0388 | 0,1294 | 161,81  | Sn       | 2 | 2 | 0 | 939(61)    | 0,622 |
| 13 | 44,6075 | 0,1514 | 805,59  | Graphite | 0 | 1 | 1 | 4024(134)  | 0,604 |
| 14 | 44,7242 | 0,1515 | 402,8   | Graphite | 0 | 1 | 1 | 2010(71)   | 0,605 |
| 15 | 44,952  | 0,1296 | 722,91  | Sn       | 1 | 2 | 1 | 4187(115)  | 0,624 |
| 16 | 45,0696 | 0,1296 | 361,46  | Sn       | 1 | 2 | 1 | 2093(81)   | 0,624 |
| 17 | 47,2136 | 0,2836 | 3589,05 | Si       | 0 | 2 | 2 | 9138(303)  | 0,718 |
| 18 | 47,3379 | 0,2841 | 1794,52 | Si       | 0 | 2 | 2 | 4561(164)  | 0,718 |
| 19 | 50,7391 | 0,1558 | 152,21  | Graphite | 0 | 1 | 2 | 724(84)    | 0,655 |
| 20 | 50,874  | 0,1559 | 76,11   | Graphite | 0 | 1 | 2 | 361(56)    | 0,656 |
| 21 | 54,7028 | 0,1592 | 1655,56 | Graphite | 0 | 0 | 4 | 7600(199)  | 0,688 |
| 22 | 54,8499 | 0,1594 | 827,78  | Graphite | 0 | 0 | 4 | 3795(112)  | 0,689 |
| 23 | 55,3857 | 0,1324 | 80,18   | Sn       | 0 | 3 | 1 | 452(39)    | 0,639 |
| 24 | 55,535  | 0,1325 | 40,09   | Sn       | 0 | 3 | 1 | 226(19)    | 0,639 |
| 25 | 56,0019 | 0,3198 | 2445,06 | Si       | 1 | 1 | 3 | 5493(238)  | 0,73  |
| 26 | 56,1532 | 0,3204 | 1222,53 | Si       | 1 | 1 | 3 | 2741(134)  | 0,73  |
| 27 | 58,7256 | 0,3319 | 13,12   | Si       | 2 | 2 | 2 | 28(30)     | 0,734 |
| 28 | 58,8857 | 0,3326 | 6,56    | Si       | 2 | 2 | 2 | 14(16)     | 0,734 |
| 29 | 59,9287 | 0,1645 | 375,78  | Graphite | 0 | 1 | 3 | 1640(120)  | 0,731 |
| 30 | 60,0927 | 0,1647 | 187,89  | Graphite | 0 | 1 | 3 | 818(79)    | 0,733 |
| 31 | 62,5758 | 0,135  | 253,21  | Sn       | 1 | 1 | 2 | 1393(102)  | 0,649 |
| 32 | 62,7487 | 0,1351 | 126,61  | Sn       | 1 | 1 | 2 | 696(68)    | 0,65  |
| 33 | 63,833  | 0,1355 | 128,25  | Sn       | 0 | 4 | 0 | 702(77)    | 0,651 |
| 34 | 64,0102 | 0,1356 | 64,12   | Sn       | 0 | 4 | 0 | 351(50)    | 0,652 |
| 35 | 64,6317 | 0,1358 | 237,27  | Sn       | 2 | 3 | 1 | 1296(94)   | 0,652 |
| 36 | 64,8117 | 0,1359 | 118,64  | Sn       | 2 | 3 | 1 | 648(68)    | 0,653 |
| 37 | 66,9973 | 0,1369 | 12,75   | Sn       | 0 | 2 | 2 | 69(40)     | 0,656 |
| 38 | 67,1857 | 0,1369 | 6,37    | Sn       | 0 | 2 | 2 | 34(26)     | 0,656 |
| 39 | 68,9583 | 0,3821 | 698,27  | Si       | 0 | 0 | 4 | 1303(174)  | 0,748 |
| 40 | 69,1538 | 0,3831 | 349,13  | Si       | 0 | 0 | 4 | 650(96)    | 0,748 |
| 41 | 71,5404 | 0,1798 | 43,25   | Graphite | 0 | 1 | 4 | 166(62)    | 0,828 |
| 42 | 71,7455 | 0,1801 | 21,63   | Graphite | 0 | 1 | 4 | 83(40)     | 0,83  |
| 43 | 72,4584 | 0,1395 | 143,4   | Sn       | 2 | 4 | 0 | 759(83)    | 0,664 |
| 44 | 72,667  | 0,1396 | 71,7    | Sn       | 2 | 4 | 0 | 379(56)    | 0,664 |
| 45 | 73,2111 | 0,1399 | 135,54  | Sn       | 1 | 4 | 1 | 715(78)    | 0,665 |
| 46 | 73,4226 | 0,14   | 67,77   | Sn       | 1 | 4 | 1 | 357(59)    | 0,665 |

|    |          |        |         |          |   |   |   |           |       |
|----|----------|--------|---------|----------|---|---|---|-----------|-------|
| 47 | 76,1725  | 0,4224 | 1021,45 | Si       | 1 | 3 | 3 | 1717(185) | 0,758 |
| 48 | 76,3956  | 0,4237 | 510,73  | Si       | 1 | 3 | 3 | 856(96)   | 0,758 |
| 49 | 77,5318  | 0,1898 | 575,83  | Graphite | 1 | 1 | 0 | 2043(130) | 0,878 |
| 50 | 77,7604  | 0,1902 | 287,91  | Graphite | 1 | 1 | 0 | 1019(87)  | 0,88  |
| 51 | 79,5482  | 0,1437 | 232,88  | Sn       | 1 | 3 | 2 | 1192(100) | 0,674 |
| 52 | 79,7852  | 0,1438 | 116,44  | Sn       | 1 | 3 | 2 | 595(74)   | 0,674 |
| 53 | 83,6541  | 0,2019 | 1058,48 | Graphite | 1 | 1 | 2 | 3451(190) | 0,929 |
| 54 | 83,9089  | 0,2024 | 529,24  | Graphite | 1 | 1 | 2 | 1719(113) | 0,931 |
| 55 | 85,4372  | 0,2058 | 67,42   | Graphite | 0 | 1 | 5 | 214(65)   | 0,944 |
| 56 | 85,7001  | 0,2064 | 33,71   | Graphite | 0 | 1 | 5 | 107(41)   | 0,946 |
| 57 | 87,0827  | 0,2095 | 362,53  | Graphite | 0 | 0 | 6 | 1124(95)  | 0,957 |
| 58 | 87,3534  | 0,2102 | 181,26  | Graphite | 0 | 0 | 6 | 560(41)   | 0,959 |
| 59 | 87,7675  | 0,4981 | 1463,42 | Si       | 2 | 2 | 4 | 2071(191) | 0,774 |
| 60 | 88,0414  | 0,5001 | 731,71  | Si       | 2 | 2 | 4 | 1031(120) | 0,774 |
| 61 | 89,4425  | 0,1511 | 49,12   | Sn       | 3 | 4 | 1 | 238(35)   | 0,689 |
| 62 | 89,4425  | 0,1511 | 49,11   | Sn       | 0 | 5 | 1 | 238(35)   | 0,689 |
| 63 | 89,7245  | 0,1514 | 24,56   | Sn       | 0 | 5 | 1 | 119(27)   | 0,689 |
| 64 | 89,7246  | 0,1514 | 24,56   | Sn       | 3 | 4 | 1 | 119(27)   | 0,689 |
| 65 | 91,5996  | 0,153  | 7,1     | Sn       | 0 | 4 | 2 | 34(31)    | 0,692 |
| 66 | 91,8925  | 0,1533 | 3,55    | Sn       | 0 | 4 | 2 | 17(19)    | 0,692 |
| 67 | 92,5895  | 0,2234 | 20,09   | Graphite | 0 | 2 | 0 | 57(44)    | 1,003 |
| 68 | 92,8875  | 0,2242 | 10,04   | Graphite | 0 | 2 | 0 | 28(25)    | 1,005 |
| 69 | 94,1011  | 0,2276 | 38,62   | Graphite | 0 | 2 | 1 | 107(27)   | 1,016 |
| 70 | 94,4071  | 0,2284 | 19,31   | Graphite | 0 | 2 | 1 | 53(7)     | 1,018 |
| 71 | 94,6491  | 0,5513 | 580,42  | Si       | 1 | 1 | 5 | 739(134)  | 0,783 |
| 72 | 94,6491  | 0,5513 | 193,1   | Si       | 3 | 3 | 3 | 246(44)   | 0,783 |
| 73 | 94,9581  | 0,5538 | 290,21  | Si       | 1 | 1 | 5 | 368(79)   | 0,784 |
| 74 | 94,9581  | 0,5538 | 96,55   | Si       | 3 | 3 | 3 | 122(26)   | 0,784 |
| 75 | 95,2011  | 0,1566 | 0       | Sn       | 0 | 1 | 3 | 0         | 0,697 |
| 76 | 95,5131  | 0,1569 | 0       | Sn       | 0 | 1 | 3 | 0         | 0,697 |
| 77 | 95,6055  | 0,157  | 16,99   | Sn       | 3 | 3 | 2 | 79(24)    | 0,698 |
| 78 | 95,9197  | 0,1573 | 8,49    | Sn       | 3 | 3 | 2 | 39(20)    | 0,698 |
| 79 | 96,7336  | 0,1582 | 21,38   | Sn       | 4 | 4 | 0 | 98(47)    | 0,699 |
| 80 | 97,0541  | 0,1585 | 10,69   | Sn       | 4 | 4 | 0 | 49(34)    | 0,7   |
| 81 | 97,458   | 0,159  | 39,65   | Sn       | 2 | 5 | 1 | 181(63)   | 0,7   |
| 82 | 97,7826  | 0,1594 | 19,83   | Sn       | 2 | 5 | 1 | 90(48)    | 0,701 |
| 83 | 98,6571  | 0,2412 | 27,68   | Graphite | 0 | 2 | 2 | 71(60)    | 1,053 |
| 84 | 98,9887  | 0,2423 | 13,84   | Graphite | 0 | 2 | 2 | 35(39)    | 1,056 |
| 85 | 99,6389  | 0,1615 | 14,61   | Sn       | 2 | 4 | 2 | 66(43)    | 0,703 |
| 86 | 99,9763  | 0,1619 | 7,31    | Sn       | 2 | 4 | 2 | 33(30)    | 0,704 |
| 87 | 101,859  | 0,2519 | 743,54  | Graphite | 1 | 1 | 4 | 1807(169) | 1,08  |
| 88 | 102,1306 | 0,2529 | 50,84   | Graphite | 0 | 1 | 6 | 123(12)   | 1,082 |
| 89 | 102,2101 | 0,2532 | 371,77  | Graphite | 1 | 1 | 4 | 898(97)   | 1,083 |
| 90 | 102,4834 | 0,2541 | 25,42   | Graphite | 0 | 1 | 6 | 61(15)    | 1,085 |

|     |          |        |         |          |   |   |   |           |       |
|-----|----------|--------|---------|----------|---|---|---|-----------|-------|
| 91  | 103,3069 | 0,1661 | 30,76   | Sn       | 1 | 2 | 3 | 134(49)   | 0,709 |
| 92  | 103,6672 | 0,1666 | 15,38   | Sn       | 1 | 2 | 3 | 67(38)    | 0,709 |
| 93  | 104,8782 | 0,1683 | 11,2    | Sn       | 0 | 6 | 0 | 48(28)    | 0,711 |
| 94  | 105,2488 | 0,1688 | 5,6     | Sn       | 0 | 6 | 0 | 24(13)    | 0,712 |
| 95  | 106,322  | 0,661  | 683,66  | Si       | 0 | 4 | 4 | 721(183)  | 0,8   |
| 96  | 106,3903 | 0,2688 | 2,4     | Graphite | 0 | 2 | 3 | 5(1)      | 1,118 |
| 97  | 106,7026 | 0,6651 | 341,83  | Si       | 0 | 4 | 4 | 358(110)  | 0,8   |
| 98  | 106,7713 | 0,2703 | 1,2     | Graphite | 0 | 2 | 3 | 2,7(4)    | 1,121 |
| 99  | 111,6948 | 0,1791 | 2,77    | Sn       | 0 | 3 | 3 | 11(9)     | 0,721 |
| 100 | 112,1152 | 0,1798 | 1,39    | Sn       | 0 | 3 | 3 | 6(2)      | 0,722 |
| 101 | 112,1287 | 0,1799 | 40,17   | Sn       | 1 | 5 | 2 | 161(50)   | 0,722 |
| 102 | 112,5525 | 0,1806 | 20,09   | Sn       | 1 | 5 | 2 | 80(24)    | 0,722 |
| 103 | 113,3443 | 0,1821 | 23,96   | Sn       | 2 | 6 | 0 | 95(8)     | 0,723 |
| 104 | 113,641  | 0,7471 | 1228,38 | Si       | 1 | 3 | 5 | 1141(229) | 0,81  |
| 105 | 113,7781 | 0,1829 | 11,98   | Sn       | 2 | 6 | 0 | 47(3)     | 0,724 |
| 106 | 114,0773 | 0,7528 | 614,19  | Si       | 1 | 3 | 5 | 566(123)  | 0,81  |
| 107 | 114,1294 | 0,1836 | 77,16   | Sn       | 1 | 6 | 1 | 303(20)   | 0,725 |
| 108 | 114,5698 | 0,1845 | 38,58   | Sn       | 1 | 6 | 1 | 151(21)   | 0,725 |
| 109 | 116,1671 | 0,781  | 39,29   | Si       | 2 | 4 | 4 | 35(50)    | 0,813 |
| 110 | 116,6252 | 0,7874 | 19,64   | Si       | 2 | 4 | 4 | 17(31)    | 0,814 |
| 111 | 117,8054 | 0,323  | 62,26   | Graphite | 0 | 2 | 4 | 110(82)   | 1,213 |
| 112 | 118,2785 | 0,3257 | 31,13   | Graphite | 0 | 2 | 4 | 55(59)    | 1,217 |
| 113 | 120,6062 | 0,1978 | 52,6    | Sn       | 2 | 3 | 3 | 191(84)   | 0,734 |
| 114 | 121,1068 | 0,1991 | 26,3    | Sn       | 2 | 3 | 3 | 95(64)    | 0,735 |
| 115 | 123,2479 | 0,2047 | 63,05   | Sn       | 4 | 5 | 1 | 220(56)   | 0,738 |
| 116 | 123,5311 | 0,3588 | 134,42  | Graphite | 0 | 1 | 7 | 209(85)   | 1,26  |
| 117 | 123,7767 | 0,2062 | 31,52   | Sn       | 4 | 5 | 1 | 109(29)   | 0,739 |
| 118 | 124,0631 | 0,3625 | 67,21   | Graphite | 0 | 1 | 7 | 103(58)   | 1,265 |
| 119 | 126,9352 | 0,9586 | 1615,52 | Si       | 0 | 2 | 6 | 1160(276) | 0,828 |
| 120 | 127,5076 | 0,9699 | 807,76  | Si       | 0 | 2 | 6 | 573(168)  | 0,829 |

**Figure S17.** Le Bail refinement fitting for samples n-GtSi (W14): detailed views and parameters.

W16

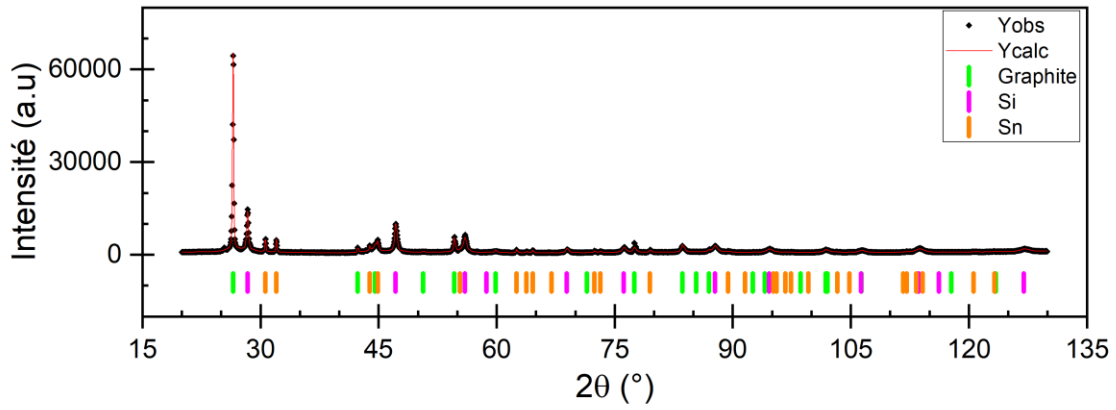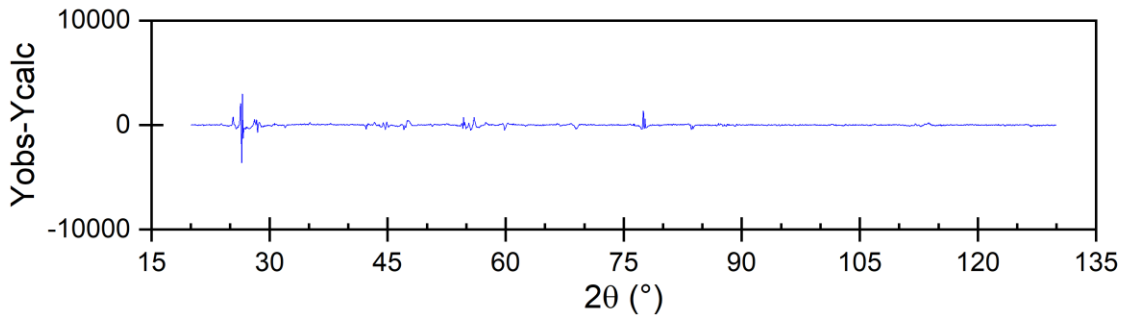

W16

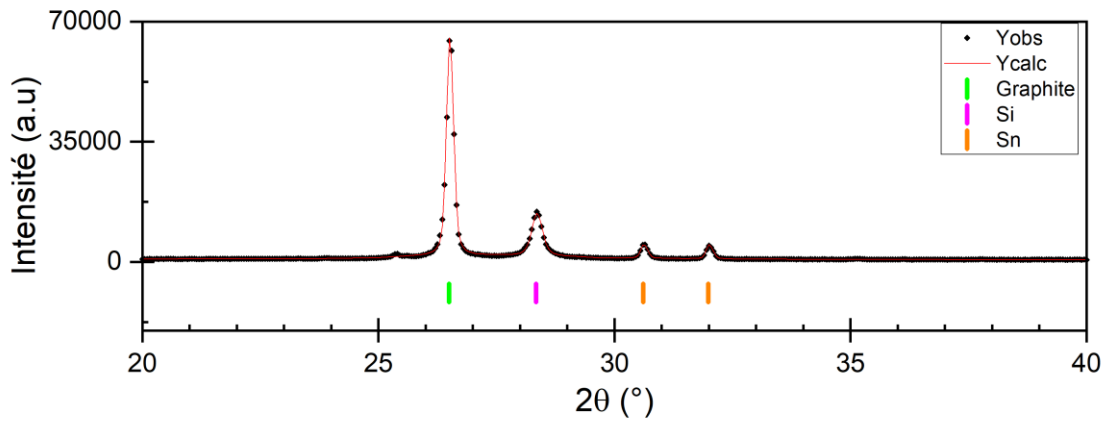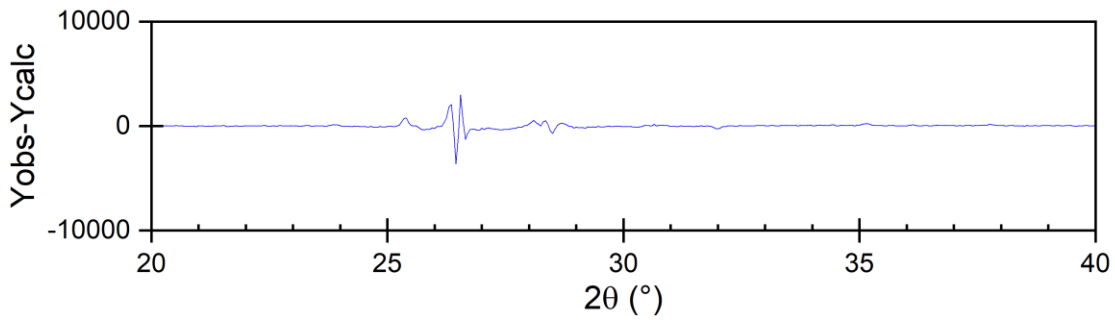

### W16

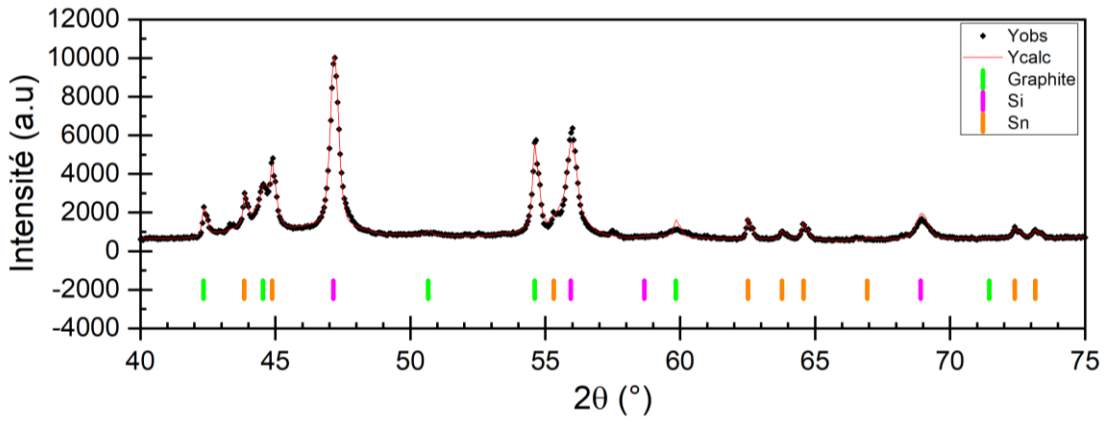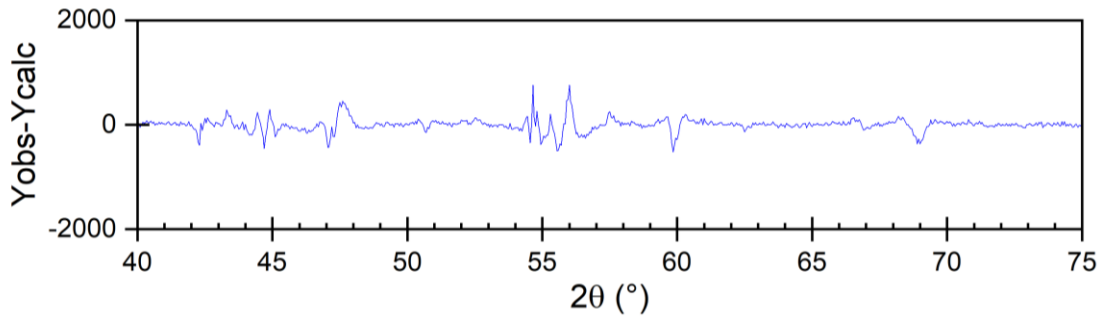

### W16

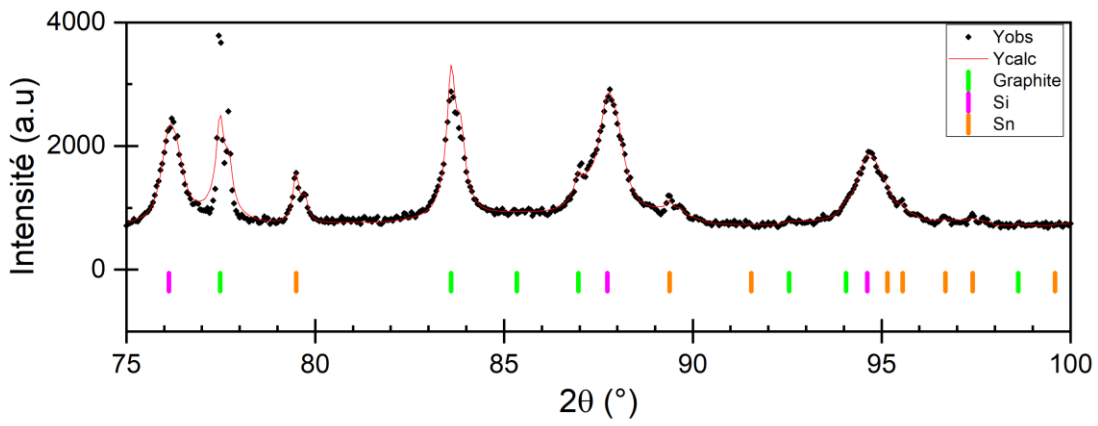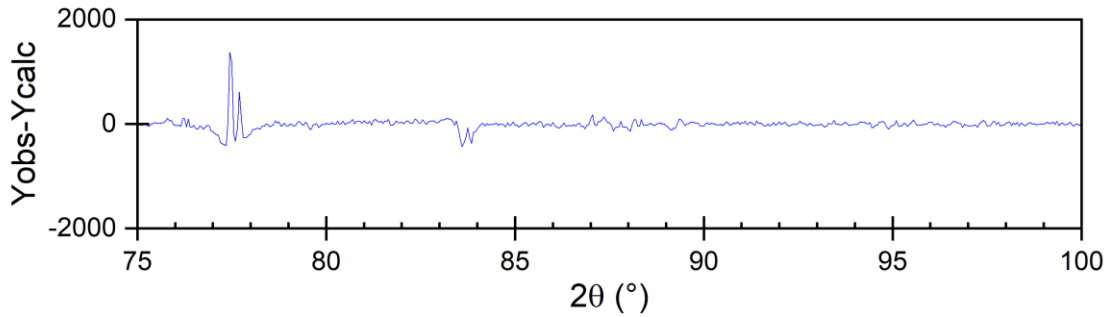

### W16

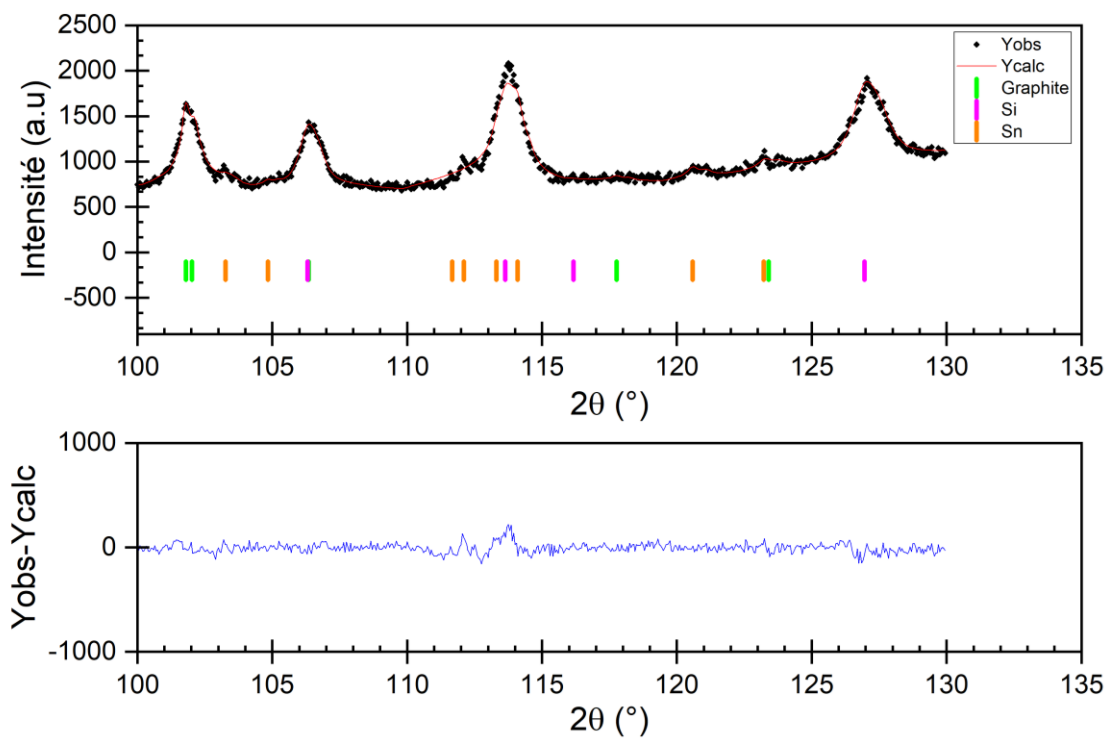

| No. | 2θ (°)  | FWHM (°) | Area calc. | Assignment | h | k | l | Height [cts] | Shape Left |
|-----|---------|----------|------------|------------|---|---|---|--------------|------------|
| 1   | 26,4948 | 0,1543   | 9710,83    | Graphite   | 0 | 0 | 2 | 48518,58     | 0,557      |
| 2   | 26,5619 | 0,1542   | 4855,41    | Graphite   | 0 | 0 | 2 | 24264,68     | 0,557      |
| 3   | 28,3384 | 0,2533   | 3031,12    | Si         | 1 | 1 | 1 | 8879,45      | 0,652      |
| 4   | 28,4104 | 0,2536   | 1515,56    | Si         | 1 | 1 | 1 | 4435,39      | 0,652      |
| 5   | 30,607  | 0,1353   | 587,1      | Sn         | 0 | 2 | 0 | 3334,6       | 0,565      |
| 6   | 30,685  | 0,1352   | 293,55     | Sn         | 0 | 2 | 0 | 1668,85      | 0,565      |
| 7   | 31,9918 | 0,1326   | 597,03     | Sn         | 0 | 1 | 1 | 3446,28      | 0,575      |
| 8   | 32,0736 | 0,1325   | 298,51     | Sn         | 0 | 1 | 1 | 1724,75      | 0,575      |
| 9   | 42,3422 | 0,1507   | 261,54     | Graphite   | 0 | 1 | 0 | 1257,05      | 0,711      |
| 10  | 42,4526 | 0,1508   | 130,77     | Graphite   | 0 | 1 | 0 | 627,89       | 0,712      |
| 11  | 43,8492 | 0,1172   | 215,93     | Sn         | 2 | 2 | 0 | 1361,36      | 0,663      |
| 12  | 43,9639 | 0,1171   | 107,97     | Sn         | 2 | 2 | 0 | 680,81       | 0,663      |
| 13  | 44,5344 | 0,1526   | 128,45     | Graphite   | 0 | 1 | 1 | 604,02       | 0,732      |
| 14  | 44,6511 | 0,1528   | 64,23      | Graphite   | 0 | 1 | 1 | 301,62       | 0,733      |
| 15  | 44,8785 | 0,1167   | 308,19     | Sn         | 1 | 2 | 1 | 1945,29      | 0,67       |
| 16  | 44,9962 | 0,1166   | 154,1      | Sn         | 1 | 2 | 1 | 972,69       | 0,671      |
| 17  | 47,148  | 0,3249   | 2959,58    | Si         | 0 | 2 | 2 | 6662,91      | 0,687      |
| 18  | 47,2723 | 0,3254   | 1479,79    | Si         | 0 | 2 | 2 | 3325,57      | 0,687      |
| 19  | 50,6613 | 0,1615   | 50,88      | Graphite   | 0 | 1 | 2 | 220,41       | 0,792      |
| 20  | 50,7962 | 0,1618   | 25,44      | Graphite   | 0 | 1 | 2 | 109,97       | 0,793      |
| 21  | 54,5973 | 0,1699   | 965,4      | Graphite   | 0 | 0 | 4 | 3911,13      | 0,83       |
| 22  | 54,7444 | 0,1702   | 482,7      | Graphite   | 0 | 0 | 4 | 1950,31      | 0,832      |

|    |         |        |         |          |   |   |   |         |       |
|----|---------|--------|---------|----------|---|---|---|---------|-------|
| 23 | 55,316  | 0,1214 | 6,34    | Sn       | 0 | 3 | 1 | 37,28   | 0,748 |
| 24 | 55,4654 | 0,1216 | 3,17    | Sn       | 0 | 3 | 1 | 18,6    | 0,749 |
| 25 | 55,9414 | 0,3658 | 1517,87 | Si       | 1 | 1 | 3 | 3014,52 | 0,703 |
| 26 | 56,0928 | 0,3665 | 758,93  | Si       | 1 | 1 | 3 | 1504    | 0,704 |
| 27 | 58,6668 | 0,3795 | 11,65   | Si       | 2 | 2 | 2 | 22,24   | 0,708 |
| 28 | 58,8269 | 0,3803 | 5,82    | Si       | 2 | 2 | 2 | 11,1    | 0,709 |
| 29 | 59,8449 | 0,1841 | 219,77  | Graphite | 0 | 1 | 3 | 803,21  | 0,881 |
| 30 | 60,0089 | 0,1846 | 109,89  | Graphite | 0 | 1 | 3 | 400,23  | 0,883 |
| 31 | 62,5115 | 0,1355 | 214,82  | Sn       | 1 | 1 | 2 | 1105,08 | 0,801 |
| 32 | 62,6845 | 0,1359 | 107,41  | Sn       | 1 | 1 | 2 | 550,42  | 0,802 |
| 33 | 63,766  | 0,1388 | 86,12   | Sn       | 0 | 4 | 0 | 430,6   | 0,81  |
| 34 | 63,9433 | 0,1393 | 43,06   | Sn       | 0 | 4 | 0 | 214,41  | 0,811 |
| 35 | 64,5658 | 0,1411 | 169,1   | Sn       | 2 | 3 | 1 | 829,73  | 0,816 |
| 36 | 64,7459 | 0,1416 | 84,55   | Sn       | 2 | 3 | 1 | 413,09  | 0,817 |
| 37 | 66,9348 | 0,1484 | 28,11   | Sn       | 0 | 2 | 2 | 130,16  | 0,834 |
| 38 | 67,1233 | 0,149  | 14,06   | Sn       | 0 | 2 | 2 | 64,77   | 0,835 |
| 39 | 68,9062 | 0,4361 | 623,37  | Si       | 0 | 0 | 4 | 1027,88 | 0,728 |
| 40 | 69,1017 | 0,4373 | 311,69  | Si       | 0 | 0 | 4 | 512,49  | 0,728 |
| 41 | 71,45   | 0,2275 | 27,71   | Graphite | 0 | 1 | 4 | 77,78   | 0,994 |
| 42 | 71,655  | 0,2284 | 13,85   | Graphite | 0 | 1 | 4 | 38,7    | 0,996 |
| 43 | 72,3953 | 0,1684 | 122,62  | Sn       | 2 | 4 | 0 | 491,41  | 0,874 |
| 44 | 72,6039 | 0,1692 | 61,31   | Sn       | 2 | 4 | 0 | 244,3   | 0,876 |
| 45 | 73,1491 | 0,1715 | 98,52   | Sn       | 1 | 4 | 1 | 386,7   | 0,88  |
| 46 | 73,3607 | 0,1724 | 49,26   | Sn       | 1 | 4 | 1 | 192,22  | 0,881 |
| 47 | 76,1256 | 0,4816 | 788,74  | Si       | 1 | 3 | 3 | 1171,14 | 0,741 |
| 48 | 76,3488 | 0,483  | 394,37  | Si       | 1 | 3 | 3 | 583,66  | 0,742 |
| 49 | 77,4799 | 0,2564 | 587,99  | Graphite | 1 | 1 | 0 | 1423,28 | 1,053 |
| 50 | 77,7087 | 0,2576 | 293,99  | Graphite | 1 | 1 | 0 | 707,59  | 1,055 |
| 51 | 79,4916 | 0,2006 | 231,45  | Sn       | 1 | 3 | 2 | 760,15  | 0,927 |
| 52 | 79,7288 | 0,2018 | 115,73  | Sn       | 1 | 3 | 2 | 377,52  | 0,928 |
| 53 | 83,5981 | 0,2905 | 1056,37 | Graphite | 1 | 1 | 2 | 2191,66 | 1,112 |
| 54 | 83,8531 | 0,292  | 528,18  | Graphite | 1 | 1 | 2 | 1088,74 | 1,115 |
| 55 | 85,3393 | 0,3011 | 3,91    | Graphite | 0 | 1 | 5 | 7,77    | 1,129 |
| 56 | 85,6022 | 0,3028 | 1,96    | Graphite | 0 | 1 | 5 | 3,86    | 1,132 |
| 57 | 86,9636 | 0,3114 | 240,5   | Graphite | 0 | 0 | 6 | 457,83  | 1,145 |
| 58 | 87,2341 | 0,3132 | 120,25  | Graphite | 0 | 0 | 6 | 227,33  | 1,148 |
| 59 | 87,7302 | 0,5669 | 1199,33 | Si       | 2 | 2 | 4 | 1498,85 | 0,763 |
| 60 | 88,0043 | 0,5691 | 599,66  | Si       | 2 | 2 | 4 | 746,32  | 0,763 |
| 61 | 89,3893 | 0,2572 | 35,04   | Sn       | 3 | 4 | 1 | 86,73   | 1     |
| 62 | 89,3893 | 0,2572 | 35,04   | Sn       | 0 | 5 | 1 | 86,72   | 1     |
| 63 | 89,6715 | 0,259  | 17,52   | Sn       | 3 | 4 | 1 | 43,02   | 1,002 |
| 64 | 89,6715 | 0,259  | 17,52   | Sn       | 0 | 5 | 1 | 43,01   | 1,002 |
| 65 | 91,5499 | 0,2715 | 5,03    | Sn       | 0 | 4 | 2 | 11,71   | 1,016 |
| 66 | 91,843  | 0,2735 | 2,52    | Sn       | 0 | 4 | 2 | 5,81    | 1,018 |

|     |          |        |        |          |   |   |   |        |       |
|-----|----------|--------|--------|----------|---|---|---|--------|-------|
| 67  | 92,5488  | 0,3498 | 25,11  | Graphite | 0 | 2 | 0 | 41,38  | 1,199 |
| 68  | 92,8471  | 0,352  | 12,56  | Graphite | 0 | 2 | 0 | 20,53  | 1,202 |
| 69  | 94,0596  | 0,3611 | 103,14 | Graphite | 0 | 2 | 1 | 163,38 | 1,214 |
| 70  | 94,3659  | 0,3634 | 51,57  | Graphite | 0 | 2 | 1 | 81,04  | 1,217 |
| 71  | 94,6184  | 0,6267 | 372,42 | Si       | 3 | 3 | 3 | 418,66 | 0,776 |
| 72  | 94,6184  | 0,6267 | 372,49 | Si       | 1 | 1 | 5 | 418,74 | 0,776 |
| 73  | 94,9277  | 0,6296 | 186,21 | Si       | 3 | 3 | 3 | 208,32 | 0,776 |
| 74  | 94,9277  | 0,6296 | 186,25 | Si       | 1 | 1 | 5 | 208,36 | 0,776 |
| 75  | 95,1575  | 0,297  | 55,35  | Sn       | 0 | 1 | 3 | 116,24 | 1,043 |
| 76  | 95,4697  | 0,2993 | 27,67  | Sn       | 0 | 1 | 3 | 57,61  | 1,045 |
| 77  | 95,5585  | 0,3    | 55,87  | Sn       | 3 | 3 | 2 | 116,02 | 1,046 |
| 78  | 95,873   | 0,3023 | 27,94  | Sn       | 3 | 3 | 2 | 57,49  | 1,048 |
| 79  | 96,6844  | 0,3085 | 19,99  | Sn       | 4 | 4 | 0 | 40,19  | 1,054 |
| 80  | 97,0052  | 0,3109 | 9,99   | Sn       | 4 | 4 | 0 | 19,91  | 1,056 |
| 81  | 97,4101  | 0,3141 | 34,46  | Sn       | 2 | 5 | 1 | 67,88  | 1,059 |
| 82  | 97,735   | 0,3166 | 17,23  | Sn       | 2 | 5 | 1 | 33,63  | 1,062 |
| 83  | 98,6135  | 0,3975 | 22,58  | Graphite | 0 | 2 | 2 | 31,73  | 1,258 |
| 84  | 98,9454  | 0,4003 | 11,29  | Graphite | 0 | 2 | 2 | 15,73  | 1,262 |
| 85  | 99,5948  | 0,3315 | 10,06  | Sn       | 2 | 4 | 2 | 18,62  | 1,076 |
| 86  | 99,9325  | 0,3343 | 5,03   | Sn       | 2 | 4 | 2 | 9,22   | 1,078 |
| 87  | 101,7934 | 0,4253 | 528,68 | Graphite | 1 | 1 | 4 | 682,62 | 1,289 |
| 88  | 102,0233 | 0,4274 | 95,53  | Graphite | 0 | 1 | 6 | 122,59 | 1,291 |
| 89  | 102,1446 | 0,4285 | 264,34 | Graphite | 1 | 1 | 4 | 338,11 | 1,293 |
| 90  | 102,3759 | 0,4306 | 47,77  | Graphite | 0 | 1 | 6 | 60,72  | 1,295 |
| 91  | 103,2695 | 0,363  | 14,58  | Sn       | 1 | 2 | 3 | 24,33  | 1,103 |
| 92  | 103,6301 | 0,3663 | 7,29   | Sn       | 1 | 2 | 3 | 12,04  | 1,106 |
| 93  | 104,8352 | 0,3773 | 31,09  | Sn       | 0 | 6 | 0 | 49,6   | 1,114 |
| 94  | 105,2062 | 0,3808 | 15,54  | Sn       | 0 | 6 | 0 | 24,54  | 1,117 |
| 95  | 106,3049 | 0,7503 | 568,03 | Si       | 0 | 4 | 4 | 528,38 | 0,798 |
| 96  | 106,3438 | 0,4691 | 10,71  | Graphite | 0 | 2 | 3 | 12,23  | 1,333 |
| 97  | 106,6859 | 0,7549 | 284,01 | Si       | 0 | 4 | 4 | 262,5  | 0,798 |
| 98  | 106,7251 | 0,4731 | 5,36   | Graphite | 0 | 2 | 3 | 6,05   | 1,337 |
| 99  | 111,6651 | 0,447  | 0      | Sn       | 0 | 3 | 3 | 0      | 1,165 |
| 100 | 112,086  | 0,4517 | 0      | Sn       | 0 | 3 | 3 | 0      | 1,168 |
| 101 | 112,0955 | 0,4518 | 0      | Sn       | 1 | 5 | 2 | 0      | 1,168 |
| 102 | 112,5198 | 0,4567 | 0      | Sn       | 1 | 5 | 2 | 0      | 1,171 |
| 103 | 113,3092 | 0,4658 | 71,28  | Sn       | 2 | 6 | 0 | 89,22  | 1,177 |
| 104 | 113,6343 | 0,8474 | 812,2  | Si       | 1 | 3 | 5 | 664,96 | 0,811 |
| 105 | 113,7435 | 0,4709 | 35,64  | Sn       | 2 | 6 | 0 | 44,05  | 1,18  |
| 106 | 114,0713 | 0,8538 | 406,1  | Si       | 1 | 3 | 5 | 329,87 | 0,812 |
| 107 | 114,0959 | 0,4751 | 182,62 | Sn       | 1 | 6 | 1 | 223,43 | 1,183 |
| 108 | 114,5368 | 0,4804 | 91,31  | Sn       | 1 | 6 | 1 | 110,29 | 1,186 |
| 109 | 116,1646 | 0,8856 | 9,08   | Si       | 2 | 4 | 4 | 7,1    | 0,816 |
| 110 | 116,6234 | 0,8928 | 4,54   | Si       | 2 | 4 | 4 | 3,52   | 0,817 |

|     |          |        |         |          |   |   |   |        |       |
|-----|----------|--------|---------|----------|---|---|---|--------|-------|
| 111 | 117,7559 | 0,6056 | 64,76   | Graphite | 0 | 2 | 4 | 53,7   | 1,444 |
| 112 | 118,2295 | 0,6123 | 32,38   | Graphite | 0 | 2 | 4 | 26,48  | 1,449 |
| 113 | 120,587  | 0,5606 | 111,15  | Sn       | 2 | 3 | 3 | 112,35 | 1,231 |
| 114 | 121,0883 | 0,568  | 55,57   | Sn       | 2 | 3 | 3 | 55,34  | 1,235 |
| 115 | 123,2255 | 0,6006 | 90,14   | Sn       | 4 | 5 | 1 | 84,16  | 1,251 |
| 116 | 123,4077 | 0,6923 | 37,48   | Graphite | 0 | 1 | 7 | 26,28  | 1,499 |
| 117 | 123,755  | 0,6091 | 45,07   | Sn       | 4 | 5 | 1 | 41,41  | 1,255 |
| 118 | 123,9392 | 0,7013 | 18,74   | Graphite | 0 | 1 | 7 | 12,93  | 1,505 |
| 119 | 126,9541 | 1,0861 | 1096,81 | Si       | 0 | 2 | 6 | 692,98 | 0,836 |
| 120 | 127,5279 | 1,0989 | 548,4   | Si       | 0 | 2 | 6 | 342,29 | 0,837 |

**Figure S18.** Le Bail refinement fitting for samples R-GtSi (W16): detailed views and parameters.
